# Supplementary material for: Expression of PD-1 and CTLA-4 Are Negative Prognostic Markers in Renal Cell Carcinoma
Source: MDPI journal article supplement (doi:10.3390/jcm8050743), 2019-05-24
Supplement: s1 [file s1]

## RCC for Publication.sav

|    | Diagnosedatum_<br>Primär | Met_EarliestDatum | Last_contact_<br>Datum | AgeAtDiagnosis | Diagnosis_to<br>_lastcontact |
|----|--------------------------|-------------------|------------------------|----------------|------------------------------|
| 1  | 24.06.2010               | .                 | 01.06.2012             | 55             | 23                           |
| 2  | 18.08.2011               | .                 | 09.01.2012             | 67             | 4                            |
| 3  | 17.10.2003               | .                 | 01.07.2012             | 73             | 104                          |
| 4  | 15.02.2007               | .                 | 01.08.2012             | 81             | 65                           |
| 5  | 20.07.2006               | .                 | 01.07.2012             | 47             | 71                           |
| 6  | 04.05.2005               | .                 | 09.08.2005             | 69             | 3                            |
| 7  | 05.03.2010               | 05.03.2010        | 16.10.2010             | 79             | 7                            |
| 8  | 24.07.1998               | 12.07.2003        | 12.07.2003             | 62             | 59                           |
| 9  | 14.02.2002               | .                 | 14.06.2010             | 80             | 100                          |
| 10 | 09.10.2002               | .                 | 01.07.2012             | 42             | 116                          |
| 11 | 24.10.2003               | .                 | 01.01.2007             | 51             | 38                           |
| 12 | 27.11.2003               | .                 | 01.07.2012             | 58             | 103                          |
| 13 | 11.06.2004               | .                 | 01.01.2007             | 69             | 30                           |
| 14 | 09.06.2005               | 26.09.2008        | 01.07.2012             | 55             | 84                           |
| 15 | 21.11.2005               | .                 | 01.07.2012             | 41             | 79                           |
| 16 | 10.04.2006               | .                 | 29.05.2012             | 57             | 73                           |
| 17 | 08.06.2006               | .                 | 01.07.2012             | 50             | 72                           |
| 18 | 30.11.2007               | .                 | 01.08.2012             | 42             | 56                           |
| 19 | 15.02.2010               | .                 | 10.02.2012             | 64             | 23                           |
| 20 | 01.07.2010               | .                 | 01.07.2012             | 66             | 24                           |
| 21 | 11.08.2010               | .                 | 31.07.2012             | 63             | 23                           |
| 22 | 09.09.2010               | .                 | 11.01.2012             | 73             | 16                           |
| 23 | 15.10.2010               | .                 | 23.03.2012             | 71             | 17                           |
| 24 | 11.01.2011               | .                 | 09.03.2012             | 79             | 13                           |
| 25 | 01.02.2011               | .                 | 23.05.2012             | 88             | 15                           |
| 26 | 11.04.2011               | .                 | 01.07.2012             | 70             | 14                           |
| 27 | 24.05.2011               | .                 | 01.07.2012             | 74             | 13                           |
| 28 | 22.08.2011               | .                 | 01.08.2012             | 67             | 11                           |
| 29 | 12.09.2011               | .                 | 01.07.2012             | 56             | 9                            |
| 30 | 26.09.2005               | .                 | 01.08.2012             | 47             | 82                           |
| 31 | 23.10.2006               | .                 | 01.07.2012             | 50             | 68                           |
| 32 | 06.04.2011               | .                 | 09.05.2012             | 53             | 13                           |
| 33 | 15.01.2005               | .                 | 19.11.2009             | 61             | 58                           |
| 34 | 22.08.2008               | .                 | 01.08.2012             | 71             | 47                           |
| 35 | 10.09.2002               | 08.01.2004        | 21.08.2004             | 72             | 23                           |
| 36 | 15.05.2004               | .                 | 28.02.2012             | 75             | 93                           |
| 37 | 18.05.2004               | .                 | 01.07.2012             | 62             | 97                           |

# RCC for Publication.sav

|    | Survival_OS | Survival_DSS | Geschlecht | pT_grouped |
|----|-------------|--------------|------------|------------|
| 1  | ,00         | ,00          | 1,00       | 1,00       |
| 2  | ,00         | ,00          | 2,00       | 1,00       |
| 3  | ,00         | ,00          | 1,00       | 1,00       |
| 4  | ,00         | ,00          | 1,00       | 1,00       |
| 5  | ,00         | ,00          | 2,00       | 1,00       |
| 6  | 1,00        | ,00          | 2,00       | 3,00       |
| 7  | 1,00        | ,00          | 2,00       | 3,00       |
| 8  | 1,00        | 1,00         | 2,00       | 1,00       |
| 9  | 1,00        | ,00          | 1,00       | 1,00       |
| 10 | ,00         | ,00          | 2,00       | 2,00       |
| 11 | ,00         | ,00          | 2,00       | 1,00       |
| 12 | ,00         | ,00          | 2,00       | 1,00       |
| 13 | ,00         | ,00          | 1,00       | 2,00       |
| 14 | ,00         | ,00          | 1,00       | 1,00       |
| 15 | ,00         | ,00          | 1,00       | 2,00       |
| 16 | ,00         | ,00          | 1,00       | 1,00       |
| 17 | ,00         | ,00          | 1,00       | 1,00       |
| 18 | ,00         | ,00          | 2,00       | 1,00       |
| 19 | ,00         | ,00          | 1,00       | 1,00       |
| 20 | ,00         | ,00          | 1,00       | 1,00       |
| 21 | ,00         | ,00          | 1,00       | 1,00       |
| 22 | 1,00        | ,00          | 2,00       | 3,00       |
| 23 | ,00         | ,00          | 2,00       | 3,00       |
| 24 | 1,00        | ,00          | 2,00       | 1,00       |
| 25 | ,00         | ,00          | 2,00       | 1,00       |
| 26 | ,00         | ,00          | 1,00       | 1,00       |
| 27 | ,00         | ,00          | 1,00       | 2,00       |
| 28 | ,00         | ,00          | 2,00       | 3,00       |
| 29 | ,00         | ,00          | 2,00       | 1,00       |
| 30 | ,00         | ,00          | 2,00       | 1,00       |
| 31 | ,00         | ,00          | 2,00       | 3,00       |
| 32 | ,00         | ,00          | 2,00       | 1,00       |
| 33 | 1,00        | 1,00         | 2,00       | .          |
| 34 | ,00         | ,00          | 2,00       | 1,00       |
| 35 | 1,00        | 1,00         | 2,00       | 3,00       |
| 36 | ,00         | ,00          | 2,00       | 1,00       |
| 37 | ,00         | ,00          | 2,00       | 1,00       |

RCC for Publication.sav

|    | Morphology_coded | Grading_Paktuell<br>April2013 | ECOG | Prop_PD1 |
|----|------------------|-------------------------------|------|----------|
| 1  | 4,00             | .                             | 0    | ,00      |
| 2  | 4,00             | 3                             | 0    | ,00      |
| 3  | 4,00             | 3                             | .    | ,00      |
| 4  | 4,00             | 2                             | 1    | ,00      |
| 5  | 4,00             | 2                             | 0    | ,00      |
| 6  | 4,00             | 3                             | 0    | ,00      |
| 7  | 4,00             | 3                             | 1    | 1,00     |
| 8  | 3,00             | 2                             | .    | ,00      |
| 9  | 3,00             | 2                             | .    | ,00      |
| 10 | 3,00             | 2                             | .    | ,00      |
| 11 | 3,00             | 2                             | .    | ,00      |
| 12 | 3,00             | 2                             | .    | ,00      |
| 13 | 3,00             | 2                             | 0    | ,00      |
| 14 | 3,00             | 2                             | 0    | ,00      |
| 15 | 3,00             | 3                             | 0    | ,00      |
| 16 | 3,00             | 2                             | 0    | ,00      |
| 17 | 3,00             | 2                             | 1    | ,00      |
| 18 | 3,00             | 2                             | 0    | ,00      |
| 19 | 3,00             | 2                             | 1    | ,00      |
| 20 | 3,00             | 2                             | 1    | ,00      |
| 21 | 3,00             | 2                             | 0    | ,00      |
| 22 | 3,00             | 2                             | 0    | ,00      |
| 23 | 3,00             | 3                             | 0    | ,00      |
| 24 | 3,00             | 2                             | 1    | ,00      |
| 25 | 3,00             | 2                             | 0    | ,00      |
| 26 | 3,00             | 2                             | 0    | ,00      |
| 27 | 3,00             | 2                             | 0    | ,00      |
| 28 | 3,00             | 2                             | 0    | ,00      |
| 29 | 3,00             | 2                             | .    | ,00      |
| 30 | 3,00             | 2                             | 0    | ,00      |
| 31 | 3,00             | 2                             | 0    | ,00      |
| 32 | 2,00             | 2                             | 0    | .        |
| 33 | 2,00             | 3                             | 0    | .        |
| 34 | 2,00             | 1                             | 0    | ,00      |
| 35 | 2,00             | 2                             | 0    | ,00      |
| 36 | 2,00             | 2                             | 1    | ,00      |
| 37 | 2,00             | 2                             | 0    | ,00      |

RCC for Publication.sav

|    | Intens_PD1 | PD1IRS | Prop_PDL1_TU | Intens_PDL1_TU | PDL1_TU_IRS |
|----|------------|--------|--------------|----------------|-------------|
| 1  | .          | ,00    | ,00          | .              | ,00         |
| 2  | .          | ,00    | ,00          | .              | ,00         |
| 3  | .          | ,00    | 2,00         | 1,00           | 2,00        |
| 4  | .          | ,00    | 1,00         | 1,00           | 1,00        |
| 5  | .          | ,00    | ,00          | .              | ,00         |
| 6  | .          | ,00    | 2,00         | 1,00           | 2,00        |
| 7  | 1,00       | 1,00   | ,00          | .              | ,00         |
| 8  | .          | ,00    | ,00          | .              | ,00         |
| 9  | .          | ,00    | ,00          | .              | ,00         |
| 10 | .          | ,00    | ,00          | .              | ,00         |
| 11 | .          | ,00    | ,00          | .              | ,00         |
| 12 | .          | ,00    | ,00          | .              | ,00         |
| 13 | .          | ,00    | ,00          | .              | ,00         |
| 14 | .          | ,00    | ,00          | .              | ,00         |
| 15 | .          | ,00    | ,00          | .              | ,00         |
| 16 | .          | ,00    | ,00          | .              | ,00         |
| 17 | .          | ,00    | ,00          | .              | ,00         |
| 18 | .          | ,00    | ,00          | .              | ,00         |
| 19 | .          | ,00    | ,00          | .              | ,00         |
| 20 | .          | ,00    | ,00          | .              | ,00         |
| 21 | .          | ,00    | ,00          | .              | ,00         |
| 22 | .          | ,00    | ,00          | .              | ,00         |
| 23 | .          | ,00    | ,00          | .              | ,00         |
| 24 | .          | ,00    | ,00          | .              | ,00         |
| 25 | .          | ,00    | ,00          | .              | ,00         |
| 26 | .          | ,00    | ,00          | .              | ,00         |
| 27 | .          | ,00    | ,00          | .              | ,00         |
| 28 | .          | ,00    | ,00          | .              | ,00         |
| 29 | .          | ,00    | ,00          | .              | ,00         |
| 30 | .          | ,00    | 2,00         | 1,00           | 2,00        |
| 31 | .          | ,00    | ,00          | .              | ,00         |
| 32 | .          | .      | ,00          | .              | ,00         |
| 33 | .          | .      | 3,00         | 3,00           | 9,00        |
| 34 | .          | ,00    | .            | .              | .           |
| 35 | .          | ,00    | .            | .              | .           |
| 36 | .          | ,00    | ,00          | .              | ,00         |
| 37 | .          | ,00    | ,00          | .              | ,00         |

## RCC for Publication.sav

|    | Prop_PDL1_Lymph | Intens_PDL1_Lymph | PDL1_Lymph_IRS | andreasProp_Lymph_CTLA4_TU |
|----|-----------------|-------------------|----------------|----------------------------|
| 1  | .               | .                 | ,00            | ,00                        |
| 2  | .               | .                 | ,00            | ,00                        |
| 3  | .               | .                 | ,00            | 1,00                       |
| 4  | .               | .                 | ,00            | ,00                        |
| 5  | 2,00            | 1,00              | 1,00           | 10,00                      |
| 6  | 2,00            | 2,00              | 4,00           | 10,00                      |
| 7  | .               | .                 | ,00            | 2,00                       |
| 8  | .               | .                 | ,00            | ,00                        |
| 9  | .               | .                 | ,00            | ,00                        |
| 10 | .               | .                 | ,00            | ,00                        |
| 11 | .               | .                 | ,00            | ,00                        |
| 12 | .               | .                 | ,00            | ,00                        |
| 13 | .               | .                 | ,00            | ,00                        |
| 14 | .               | .                 | ,00            | ,00                        |
| 15 | .               | .                 | ,00            | ,00                        |
| 16 | .               | .                 | ,00            | ,00                        |
| 17 | .               | .                 | ,00            | ,00                        |
| 18 | .               | .                 | ,00            | ,00                        |
| 19 | .               | .                 | ,00            | ,00                        |
| 20 | .               | .                 | ,00            | ,00                        |
| 21 | .               | .                 | ,00            | ,00                        |
| 22 | .               | .                 | ,00            | ,00                        |
| 23 | .               | .                 | ,00            | ,00                        |
| 24 | .               | .                 | ,00            | ,00                        |
| 25 | .               | .                 | ,00            | ,00                        |
| 26 | .               | .                 | ,00            | ,00                        |
| 27 | .               | .                 | ,00            | ,00                        |
| 28 | .               | .                 | ,00            | ,00                        |
| 29 | .               | .                 | ,00            | ,00                        |
| 30 | .               | .                 | ,00            | ,00                        |
| 31 | 1,00            | 1,00              | 1,00           | ,00                        |
| 32 | .               | .                 | ,00            | .                          |
| 33 | .               | .                 | ,00            | ,00                        |
| 34 | .               | .                 | .              | ,00                        |
| 35 | .               | .                 | .              | .                          |
| 36 | .               | .                 | ,00            | ,00                        |
| 37 | .               | .                 | ,00            | ,00                        |

RCC for Publication.sav

|    | CD3medianbis2k5unddarüber |
|----|---------------------------|
| 1  | ,00                       |
| 2  | ,00                       |
| 3  | ,00                       |
| 4  | ,00                       |
| 5  | 1,00                      |
| 6  | ,00                       |
| 7  | ,00                       |
| 8  | ,00                       |
| 9  | ,00                       |
| 10 | ,00                       |
| 11 | ,00                       |
| 12 | ,00                       |
| 13 | ,00                       |
| 14 | ,00                       |
| 15 | ,00                       |
| 16 | ,00                       |
| 17 | ,00                       |
| 18 | ,00                       |
| 19 | ,00                       |
| 20 | .                         |
| 21 | ,00                       |
| 22 | ,00                       |
| 23 | ,00                       |
| 24 | ,00                       |
| 25 | ,00                       |
| 26 | ,00                       |
| 27 | ,00                       |
| 28 | ,00                       |
| 29 | ,00                       |
| 30 | ,00                       |
| 31 | ,00                       |
| 32 | ,00                       |
| 33 | .                         |
| 34 | ,00                       |
| 35 | ,00                       |
| 36 | ,00                       |
| 37 | ,00                       |

## RCC for Publication.sav

|    | Diagnosedatum_<br>Primär | Met_EarliestDatum | Last_contact_<br>Datum | AgeAtDiagnosis | Diagnosis_to<br>_lastcontact |
|----|--------------------------|-------------------|------------------------|----------------|------------------------------|
| 38 | 28.09.2005               | .                 | 02.05.2012             | 71             | 79                           |
| 39 | 06.10.2005               | .                 | 01.07.2012             | 58             | 80                           |
| 40 | 31.10.2006               | .                 | 01.07.2012             | 64             | 68                           |
| 41 | 15.02.2007               | .                 | 01.08.2012             | 58             | 65                           |
| 42 | 18.04.2007               | 10.08.2011        | 01.07.2012             | 65             | 62                           |
| 43 | 14.12.2007               | .                 | 01.07.2012             | 61             | 54                           |
| 44 | 30.06.2008               | .                 | 24.04.2009             | 71             | 9                            |
| 45 | 17.07.2008               | .                 | 17.12.2011             | 50             | 41                           |
| 46 | 19.12.2008               | .                 | 01.07.2012             | 67             | 42                           |
| 47 | 15.01.2009               | .                 | 01.07.2012             | 59             | 41                           |
| 48 | 15.02.2009               | .                 | 01.07.2012             | 58             | 40                           |
| 49 | 30.10.2009               | 28.07.2010        | 20.11.2010             | 92             | 12                           |
| 50 | 02.11.2009               | .                 | 01.08.2012             | 57             | 32                           |
| 51 | 15.01.2010               | 15.01.2010        | 17.11.2010             | 73             | 10                           |
| 52 | 24.02.2010               | 29.09.2011        | 25.01.2012             | 61             | 23                           |
| 53 | 27.04.2010               | .                 | 19.04.2012             | 64             | 23                           |
| 54 | 09.06.2010               | .                 | 16.12.2010             | 68             | 6                            |
| 55 | 15.08.2010               | .                 | 06.06.2012             | 56             | 21                           |
| 56 | 19.04.2011               | .                 | 21.02.2012             | 53             | 10                           |
| 57 | 30.06.2010               | .                 | 18.04.2012             | 72             | 21                           |
| 58 | 07.02.2005               | .                 | 22.02.2012             | 71             | 84                           |
| 59 | 30.06.2006               | .                 | 24.06.2007             | 78             | 11                           |
| 60 | 10.01.2007               | .                 | 01.08.2012             | 56             | 66                           |
| 61 | 15.10.2008               | .                 | 21.11.2008             | 73             | 1                            |
| 62 | 02.03.2010               | .                 | 01.07.2012             | 76             | 27                           |
| 63 | 04.11.2011               | .                 | 05.07.2012             | 77             | 8                            |
| 64 | 08.12.2011               | .                 | 27.06.2012             | 70             | 6                            |
| 65 | 15.07.2010               | .                 | 02.04.2012             | 60             | 20                           |
| 66 | 21.02.2007               | .                 | 10.08.2011             | 80             | 53                           |
| 67 | 04.06.2007               | .                 | 16.04.2012             | 74             | 58                           |
| 68 | 01.07.2006               | 01.07.2006        | 25.02.2007             | 47             | 7                            |
| 69 | 02.11.2006               | .                 | 23.10.2010             | 71             | 47                           |
| 70 | 05.02.2009               | .                 | 01.07.2012             | 48             | 40                           |
| 71 | 15.04.2010               | .                 | 21.05.2012             | 62             | 25                           |
| 72 | 20.04.2006               | .                 | 24.04.2012             | 68             | 72                           |
| 73 | 08.04.2003               | .                 | 30.06.2010             | 73             | 86                           |
| 74 | 27.03.2007               | .                 | 01.07.2012             | 63             | 63                           |

RCC for Publication.sav

|    | Survival_OS | Survival_DSS | Geschlecht | pT_grouped |
|----|-------------|--------------|------------|------------|
| 38 | ,00         | ,00          | 1,00       | 1,00       |
| 39 | ,00         | ,00          | 2,00       | .          |
| 40 | ,00         | ,00          | 2,00       | 1,00       |
| 41 | ,00         | ,00          | 1,00       | 1,00       |
| 42 | ,00         | ,00          | 2,00       | 2,00       |
| 43 | ,00         | ,00          | 1,00       | 3,00       |
| 44 | 1,00        | ,00          | 2,00       | 1,00       |
| 45 | ,00         | ,00          | 2,00       | 1,00       |
| 46 | ,00         | ,00          | 2,00       | 1,00       |
| 47 | ,00         | ,00          | 1,00       | 1,00       |
| 48 | ,00         | ,00          | 2,00       | 1,00       |
| 49 | 1,00        | ,00          | 1,00       | 3,00       |
| 50 | ,00         | ,00          | 2,00       | 1,00       |
| 51 | 1,00        | ,00          | 2,00       | .          |
| 52 | ,00         | ,00          | 2,00       | 1,00       |
| 53 | ,00         | ,00          | 2,00       | 1,00       |
| 54 | 1,00        | ,00          | 1,00       | 1,00       |
| 55 | ,00         | ,00          | 2,00       | 1,00       |
| 56 | ,00         | ,00          | 1,00       | 1,00       |
| 57 | ,00         | ,00          | 2,00       | 2,00       |
| 58 | ,00         | ,00          | 1,00       | 3,00       |
| 59 | 1,00        | ,00          | 1,00       | 1,00       |
| 60 | ,00         | ,00          | 2,00       | 1,00       |
| 61 | 1,00        | ,00          | 2,00       | 1,00       |
| 62 | ,00         | ,00          | 2,00       | 1,00       |
| 63 | ,00         | ,00          | 2,00       | 1,00       |
| 64 | ,00         | ,00          | 2,00       | 1,00       |
| 65 | ,00         | ,00          | 2,00       | 1,00       |
| 66 | 1,00        | ,00          | 2,00       | 2,00       |
| 67 | ,00         | ,00          | 1,00       | 1,00       |
| 68 | 1,00        | 1,00         | 2,00       | 3,00       |
| 69 | 1,00        | ,00          | 2,00       | 1,00       |
| 70 | ,00         | ,00          | 2,00       | .          |
| 71 | ,00         | ,00          | 2,00       | 1,00       |
| 72 | ,00         | ,00          | 2,00       | 1,00       |
| 73 | 1,00        | ,00          | 2,00       | 1,00       |
| 74 | ,00         | ,00          | 1,00       | .          |



## RCC for Publication.sav

|    | Morphology_coded | Grading_Paktuell<br>April2013 | ECOG | Prop_PD1 |
|----|------------------|-------------------------------|------|----------|
| 38 | 2,00             | 2                             | 1    | ,00      |
| 39 | 2,00             | 2                             | 0    | ,00      |
| 40 | 2,00             | 2                             | 0    | ,00      |
| 41 | 2,00             | 2                             | 0    | ,00      |
| 42 | 2,00             | 2                             | 0    | ,00      |
| 43 | 2,00             | 2                             | 2    | ,00      |
| 44 | 2,00             | 2                             | 1    | ,00      |
| 45 | 2,00             | 2                             | 0    | ,00      |
| 46 | 2,00             | 2                             | 1    | ,00      |
| 47 | 2,00             | 1                             | 0    | ,00      |
| 48 | 2,00             | 1                             | 0    | ,00      |
| 49 | 2,00             | 3                             | 0    | ,00      |
| 50 | 2,00             | 2                             | 0    | ,00      |
| 51 | 2,00             | 2                             | 0    | ,00      |
| 52 | 2,00             | 2                             | 1    | ,00      |
| 53 | 2,00             | 2                             | 1    | ,00      |
| 54 | 2,00             | 2                             | 0    | ,00      |
| 55 | 2,00             | 2                             | 0    | ,00      |
| 56 | 2,00             | 2                             | .    | ,00      |
| 57 | 2,00             | 2                             | 0    | ,00      |
| 58 | 2,00             | 2                             | 0    | ,00      |
| 59 | 2,00             | 2                             | 1    | ,00      |
| 60 | 2,00             | 2                             | 0    | ,00      |
| 61 | 2,00             | 2                             | 1    | ,00      |
| 62 | 2,00             | 2                             | .    | ,00      |
| 63 | 2,00             | 2                             | 0    | ,00      |
| 64 | 2,00             | 2                             | .    | ,00      |
| 65 | 2,00             | 2                             | 1    | ,00      |
| 66 | 2,00             | 3                             | 1    | ,00      |
| 67 | 2,00             | 3                             | 0    | ,00      |
| 68 | 2,00             | 3                             | 0    | 2,00     |
| 69 | 2,00             | 3                             | 1    | 1,00     |
| 70 | 2,00             | 2                             | 0    | 2,00     |
| 71 | 2,00             | 1                             | 0    | 1,00     |
| 72 | 2,00             | 3                             | 1    | 1,00     |
| 73 | 1,00             | 2                             | .    | .        |
| 74 | 1,00             | 2                             | 0    | .        |

RCC for Publication.sav

|    | Intens_PD1 | PD1IRS | Prop_PDL1_TU | Intens_PDL1_TU | PDL1_TU_IRS |
|----|------------|--------|--------------|----------------|-------------|
| 38 | .          | ,00    | ,00          | .              | ,00         |
| 39 | .          | ,00    | ,00          | .              | ,00         |
| 40 | .          | ,00    | ,00          | .              | ,00         |
| 41 | .          | ,00    | ,00          | .              | ,00         |
| 42 | .          | ,00    | ,00          | .              | ,00         |
| 43 | .          | ,00    | ,00          | .              | ,00         |
| 44 | .          | ,00    | ,00          | .              | ,00         |
| 45 | .          | ,00    | ,00          | .              | ,00         |
| 46 | .          | ,00    | ,00          | .              | ,00         |
| 47 | .          | ,00    | ,00          | .              | ,00         |
| 48 | .          | ,00    | ,00          | .              | ,00         |
| 49 | .          | ,00    | ,00          | .              | ,00         |
| 50 | .          | ,00    | ,00          | .              | ,00         |
| 51 | .          | ,00    | ,00          | .              | ,00         |
| 52 | .          | ,00    | ,00          | .              | ,00         |
| 53 | .          | ,00    | ,00          | .              | ,00         |
| 54 | .          | ,00    | ,00          | .              | ,00         |
| 55 | .          | ,00    | ,00          | .              | ,00         |
| 56 | .          | ,00    | ,00          | .              | ,00         |
| 57 | .          | ,00    | 2,00         | 2,00           | 4,00        |
| 58 | .          | ,00    | 2,00         | 1,00           | 2,00        |
| 59 | .          | ,00    | 1,00         | 1,00           | 1,00        |
| 60 | .          | ,00    | 2,00         | 2,00           | 4,00        |
| 61 | .          | ,00    | 1,00         | 1,00           | 1,00        |
| 62 | .          | ,00    | 2,00         | 1,00           | 2,00        |
| 63 | .          | ,00    | 3,00         | 2,00           | 6,00        |
| 64 | .          | ,00    | 2,00         | 2,00           | 4,00        |
| 65 | .          | ,00    | 1,00         | 1,00           | 1,00        |
| 66 | .          | ,00    | ,00          | .              | ,00         |
| 67 | .          | ,00    | 2,00         | 2,00           | 4,00        |
| 68 | 1,00       | 2,00   | ,00          | .              | ,00         |
| 69 | 1,00       | 1,00   | ,00          | .              | ,00         |
| 70 | 1,00       | 2,00   | 2,00         | 1,00           | 2,00        |
| 71 | 1,00       | 1,00   | 1,00         | 1,00           | 1,00        |
| 72 | 1,00       | 1,00   | ,00          | .              | ,00         |
| 73 | .          | .      | ,00          | .              | ,00         |
| 74 | .          | .      | ,00          | .              | ,00         |

## RCC for Publication.sav

|    | Prop_PDL1_Lymph | Intens_PDL1_Lymph | PDL1_Lymph_IRS | andreasProp_Lymph_CTLA4_TU |
|----|-----------------|-------------------|----------------|----------------------------|
| 38 | .               | .                 | ,00            | ,00                        |
| 39 | .               | .                 | ,00            | ,00                        |
| 40 | .               | .                 | ,00            | ,00                        |
| 41 | .               | .                 | ,00            | ,00                        |
| 42 | .               | .                 | ,00            | ,00                        |
| 43 | .               | .                 | ,00            | ,00                        |
| 44 | .               | .                 | ,00            | ,00                        |
| 45 | .               | .                 | ,00            | ,00                        |
| 46 | .               | .                 | ,00            | ,00                        |
| 47 | .               | .                 | ,00            | ,00                        |
| 48 | .               | .                 | ,00            | ,00                        |
| 49 | .               | .                 | ,00            | ,00                        |
| 50 | .               | .                 | ,00            | ,00                        |
| 51 | .               | .                 | ,00            | ,00                        |
| 52 | .               | .                 | ,00            | ,00                        |
| 53 | .               | .                 | ,00            | ,00                        |
| 54 | .               | .                 | ,00            | ,00                        |
| 55 | .               | .                 | ,00            | ,00                        |
| 56 | .               | .                 | ,00            | ,00                        |
| 57 | .               | .                 | ,00            | .                          |
| 58 | .               | .                 | ,00            | ,00                        |
| 59 | .               | .                 | ,00            | ,00                        |
| 60 | .               | .                 | ,00            | ,00                        |
| 61 | .               | .                 | ?              | ?                          |
| 62 | .               | .                 | ?              | ?                          |
| 63 | .               | .                 | ?              | ?                          |
| 64 | .               | .                 | ?              | ?                          |
| 65 | .               | .                 | ?              | ?                          |
| 66 | 1,00            | 1,00              | ?              | ?                          |
| 67 | 2,00            | 2,00              | ?              | ?                          |
| 68 | .               | .                 | ?              | ?                          |
| 69 | .               | .                 | ?              | ?                          |
| 70 | .               | .                 | ?              | ?                          |
| 71 | .               | .                 | ?              | ?                          |
| 72 | 1,00            | 1,00              | ?              | ?                          |
| 73 | .               | .                 | ?              | .                          |
| 74 | .               | .                 | ,00            | .                          |

## RCC for Publication.sav

|    | CD3medianbis2k5unddarüber |
|----|---------------------------|
| 38 | ,00                       |
| 39 | ,00                       |
| 40 | ,00                       |
| 41 | ,00                       |
| 42 | 1,00                      |
| 43 | ,00                       |
| 44 | ,00                       |
| 45 | 1,00                      |
| 46 | 1,00                      |
| 47 | 1,00                      |
| 48 | 1,00                      |
| 49 | ,00                       |
| 50 | 1,00                      |
| 51 | ,00                       |
| 52 | ,00                       |
| 53 | 1,00                      |
| 54 | ,00                       |
| 55 | ,00                       |
| 56 | ,00                       |
| 57 | ,00                       |
| 58 | ,00                       |
| 59 | 1,00                      |
| 60 | 1,00                      |
| 61 | ,00                       |
| 62 | 1,00                      |
| 63 | ,00                       |
| 64 | ,00                       |
| 65 | 1,00                      |
| 66 | 1,00                      |
| 67 | ,00                       |
| 68 | 1,00                      |
| 69 | ,00                       |
| 70 | ,00                       |
| 71 | 1,00                      |
| 72 | 1,00                      |
| 73 | .                         |
| 74 | 1,00                      |

## RCC for Publication.sav

|     | Diagnosedatum_<br>Primär | Met_EarliestDatum | Last_contact_<br>Datum | AgeAtDiagnosis | Diagnosis_to<br>_lastcontact |
|-----|--------------------------|-------------------|------------------------|----------------|------------------------------|
| 75  | 15.11.2007               | .                 | 01.07.2012             | 76             | 55                           |
| 76  | 02.02.2009               | .                 | 01.07.2012             | 77             | 40                           |
| 77  | 15.08.2010               | .                 | 21.05.2012             | 80             | 21                           |
| 78  | 03.12.2001               | .                 | 13.04.2004             | 72             | 28                           |
| 79  | 11.12.2001               | .                 | 27.03.2012             | 73             | 123                          |
| 80  | 25.09.2006               | .                 | 07.02.2012             | 85             | 64                           |
| 81  | 01.12.2009               | .                 | 01.07.2012             | 39             | 31                           |
| 82  | 10.01.2005               | .                 | 24.02.2010             | 71             | 61                           |
| 83  | 31.03.2010               | .                 | 18.06.2012             | 23             | 26                           |
| 84  | 15.08.2010               | .                 | 30.03.2012             | 55             | 19                           |
| 85  | 12.01.2011               | .                 | 02.03.2011             | 60             | 1                            |
| 86  | 26.11.2004               | .                 | 15.02.2012             | 65             | 86                           |
| 87  | 02.02.2009               | 02.02.2009        | 09.09.2009             | 66             | 7                            |
| 88  | 30.11.2011               | 30.11.2011        | 05.01.2012             | 73             | 1                            |
| 89  | 26.07.2004               | .                 | 01.07.2012             | 63             | 95                           |
| 90  | 28.12.2005               | .                 | 01.07.2012             | 43             | 78                           |
| 91  | 01.02.2008               | 01.02.2008        | 11.04.2009             | 69             | 14                           |
| 92  | 15.12.2009               | .                 | 23.05.2012             | 74             | 29                           |
| 93  | 15.12.2001               | .                 | 01.07.2012             | 64             | 126                          |
| 94  | 19.12.2001               | 30.06.2004        | 28.09.2004             | 85             | 33                           |
| 95  | 18.01.2002               | .                 | 01.07.2012             | 54             | 125                          |
| 96  | 19.01.2002               | .                 | 01.07.2012             | 72             | 125                          |
| 97  | 04.02.2002               | .                 | 01.08.2012             | 60             | 125                          |
| 98  | 19.03.2002               | .                 | 03.04.2004             | 78             | 24                           |
| 99  | 22.04.2002               | .                 | 01.07.2012             | 56             | 122                          |
| 100 | 15.05.2002               | 15.05.2002        | 24.07.2003             | 70             | 14                           |
| 101 | 21.06.2002               | 17.12.2002        | 27.05.2003             | 64             | 11                           |
| 102 | 08.07.2002               | .                 | 01.07.2012             | 48             | 119                          |
| 103 | 16.01.2003               | .                 | 04.11.2011             | 50             | 105                          |
| 104 | 09.04.2003               | 09.04.2003        | 01.07.2012             | 60             | 110                          |
| 105 | 11.04.2003               | 26.06.2004        | 24.10.2008             | 65             | 66                           |
| 106 | 11.04.2003               | 26.06.2004        | 24.10.2008             | 65             | 66                           |
| 107 | 27.05.2003               | .                 | 25.06.2009             | 77             | 72                           |
| 108 | 16.06.2003               | .                 | 01.07.2012             | 56             | 108                          |
| 109 | 26.06.2003               | .                 | 01.07.2012             | 75             | 108                          |
| 110 | 30.06.2003               | .                 | 01.07.2012             | 62             | 108                          |
| 111 | 09.07.2003               | .                 | 01.01.2007             | 79             | 41                           |

RCC for Publication.sav

|     | Survival_OS | Survival_DSS | Geschlecht | pT_grouped |
|-----|-------------|--------------|------------|------------|
| 75  | ,00         | ,00          | 1,00       | 1,00       |
| 76  | ,00         | ,00          | 2,00       | 1,00       |
| 77  | ,00         | ,00          | 1,00       | 1,00       |
| 78  | 1,00        | 1,00         | 2,00       | 1,00       |
| 79  | ,00         | ,00          | 2,00       | 1,00       |
| 80  | ,00         | ,00          | 2,00       | 1,00       |
| 81  | ,00         | ,00          | 2,00       | 1,00       |
| 82  | 1,00        | ,00          | 2,00       | 1,00       |
| 83  | ,00         | ,00          | 2,00       | 1,00       |
| 84  | ,00         | ,00          | 1,00       | 1,00       |
| 85  | 1,00        | ,00          | 2,00       | 1,00       |
| 86  | ,00         | ,00          | 2,00       | 1,00       |
| 87  | 1,00        | 1,00         | 1,00       | 2,00       |
| 88  | ,00         | ,00          | 2,00       | 1,00       |
| 89  | ,00         | ,00          | 1,00       | 1,00       |
| 90  | ,00         | ,00          | 2,00       | 3,00       |
| 91  | 1,00        | 1,00         | 2,00       | 1,00       |
| 92  | ,00         | ,00          | 1,00       | 3,00       |
| 93  | ,00         | ,00          | 1,00       | 1,00       |
| 94  | 1,00        | 1,00         | 1,00       | 2,00       |
| 95  | ,00         | ,00          | 2,00       | 1,00       |
| 96  | ,00         | ,00          | 2,00       | 2,00       |
| 97  | ,00         | ,00          | 2,00       | 1,00       |
| 98  | 1,00        | 1,00         | 1,00       | 3,00       |
| 99  | ,00         | ,00          | 2,00       | 1,00       |
| 100 | 1,00        | ,00          | 2,00       | 1,00       |
| 101 | 1,00        | 1,00         | 2,00       | 2,00       |
| 102 | ,00         | ,00          | 2,00       | 3,00       |
| 103 | 1,00        | ,00          | 2,00       | 1,00       |
| 104 | ,00         | ,00          | 2,00       | 3,00       |
| 105 | 1,00        | ,00          | 2,00       | 1,00       |
| 106 | 1,00        | ,00          | 2,00       | 3,00       |
| 107 | 1,00        | 1,00         | 1,00       | 1,00       |
| 108 | ,00         | ,00          | 2,00       | 1,00       |
| 109 | ,00         | ,00          | 2,00       | 1,00       |
| 110 | ,00         | ,00          | 1,00       | 1,00       |
| 111 | ,00         | ,00          | 1,00       | 3,00       |

## RCC for Publication.sav

|     | Morphology_coded | Grading_Paktuell<br>April2013 | ECOG | Prop_PD1 |
|-----|------------------|-------------------------------|------|----------|
| 75  | 1,00             | 1                             | 0    | .        |
| 76  | 1,00             | 1                             | 0    | .        |
| 77  | 1,00             | 1                             | 1    | .        |
| 78  | 1,00             | 2                             | .    | .        |
| 79  | 1,00             | 3                             | 2    | .        |
| 80  | 1,00             | 2                             | .    | .        |
| 81  | 1,00             | 2                             | .    | .        |
| 82  | 1,00             | 2                             | 1    | .        |
| 83  | 1,00             | 2                             | 0    | ,00      |
| 84  | 1,00             | 1                             | .    | ,00      |
| 85  | 1,00             | 2                             | 0    | ,00      |
| 86  | 1,00             | 1                             | 0    | ,00      |
| 87  | 1,00             | 3                             | 1    | ,00      |
| 88  | 1,00             | 2                             | 0    | ,00      |
| 89  | 1,00             | 2                             | 0    | ,00      |
| 90  | 1,00             | 2                             | 0    | ,00      |
| 91  | 1,00             | 2                             | 3    | ,00      |
| 92  | 1,00             | 2                             | 0    | ,00      |
| 93  | 1,00             | 2                             | .    | ,00      |
| 94  | 1,00             | 3                             | 0    | ,00      |
| 95  | 1,00             | 2                             | .    | ,00      |
| 96  | 1,00             | 2                             | .    | ,00      |
| 97  | 1,00             | 2                             | .    | ,00      |
| 98  | 1,00             | 2                             | .    | ,00      |
| 99  | 1,00             | 2                             | .    | ,00      |
| 100 | 1,00             | 2                             | .    | ,00      |
| 101 | 1,00             | 3                             | .    | ,00      |
| 102 | 1,00             | 2                             | .    | ,00      |
| 103 | 1,00             | 2                             | 0    | ,00      |
| 104 | 1,00             | 2                             | .    | ,00      |
| 105 | 1,00             | 2                             | .    | ,00      |
| 106 | 1,00             | 2                             | .    | ,00      |
| 107 | 1,00             | 2                             | .    | ,00      |
| 108 | 1,00             | 3                             | .    | ,00      |
| 109 | 1,00             | 1                             | .    | ,00      |
| 110 | 1,00             | 2                             | .    | ,00      |
| 111 | 1,00             | 2                             | .    | ,00      |

RCC for Publication.sav

|     | Intens_PD1 | PD1IRS | Prop_PDL1_TU | Intens_PDL1_TU | PDL1_TU_IRS |
|-----|------------|--------|--------------|----------------|-------------|
| 75  | .          | .      | ,00          | .              | ,00         |
| 76  | .          | .      | ,00          | .              | ,00         |
| 77  | .          | .      | ,00          | .              | ,00         |
| 78  | .          | .      | ,00          | .              | ,00         |
| 79  | .          | .      | ,00          | .              | ,00         |
| 80  | .          | .      | ,00          | .              | ,00         |
| 81  | .          | .      | ,00          | .              | ,00         |
| 82  | .          | .      | ,00          | .              | ,00         |
| 83  | .          | ,00    | .            | .              | .           |
| 84  | .          | ,00    | .            | .              | .           |
| 85  | .          | ,00    | .            | .              | .           |
| 86  | .          | ,00    | .            | .              | .           |
| 87  | .          | ,00    | .            | .              | .           |
| 88  | .          | ,00    | .            | .              | .           |
| 89  | .          | ,00    | ,00          | .              | ,00         |
| 90  | .          | ,00    | ,00          | .              | ,00         |
| 91  | .          | ,00    | ,00          | .              | ,00         |
| 92  | .          | ,00    | ,00          | .              | ,00         |
| 93  | .          | ,00    | ,00          | .              | ,00         |
| 94  | .          | ,00    | ,00          | .              | ,00         |
| 95  | .          | ,00    | ,00          | .              | ,00         |
| 96  | .          | ,00    | ,00          | .              | ,00         |
| 97  | .          | ,00    | ,00          | .              | ,00         |
| 98  | .          | ,00    | ,00          | .              | ,00         |
| 99  | .          | ,00    | ,00          | .              | ,00         |
| 100 | .          | ,00    | ,00          | .              | ,00         |
| 101 | .          | ,00    | ,00          | .              | ,00         |
| 102 | .          | ,00    | ,00          | .              | ,00         |
| 103 | .          | ,00    | ,00          | .              | ,00         |
| 104 | .          | ,00    | ,00          | .              | ,00         |
| 105 | .          | ,00    | ,00          | .              | ,00         |
| 106 | .          | ,00    | ,00          | .              | ,00         |
| 107 | .          | ,00    | ,00          | .              | ,00         |
| 108 | .          | ,00    | ,00          | .              | ,00         |
| 109 | .          | ,00    | ,00          | .              | ,00         |
| 110 | .          | ,00    | ,00          | .              | ,00         |
| 111 | .          | ,00    | ,00          | .              | ,00         |



## RCC for Publication.sav

|     | Prop_PDL1_Lymph | Intens_PDL1_Lymph | PDL1_Lymph_IRS | andreasProp_Lymph_CTLA4_TU |
|-----|-----------------|-------------------|----------------|----------------------------|
| 75  | .               | .                 | ,00            | .                          |
| 76  | .               | .                 | ,00            | .                          |
| 77  | .               | .                 | ,00            | .                          |
| 78  | .               | .                 | ,00            | ,00                        |
| 79  | .               | .                 | ,00            | ,00                        |
| 80  | .               | .                 | ,00            | ,00                        |
| 81  | .               | .                 | ,00            | ,00                        |
| 82  | 2,00            | 2,00              | 4,00           | ,00                        |
| 83  | .               | .                 | .              | .                          |
| 84  | .               | .                 | .              | .                          |
| 85  | .               | .                 | .              | .                          |
| 86  | .               | .                 | .              | ,00                        |
| 87  | .               | .                 | .              | ,00                        |
| 88  | .               | .                 | .              | 10,00                      |
| 89  | .               | .                 | ,00            | .                          |
| 90  | .               | .                 | ,00            | .                          |
| 91  | .               | .                 | ,00            | .                          |
| 92  | .               | .                 | ,00            | .                          |
| 93  | .               | .                 | ,00            | ,00                        |
| 94  | .               | .                 | ,00            | ,00                        |
| 95  | .               | .                 | ,00            | ,00                        |
| 96  | .               | .                 | ,00            | ,00                        |
| 97  | .               | .                 | ,00            | 1,00                       |
| 98  | .               | .                 | ,00            | ,00                        |
| 99  | .               | .                 | ,00            | ,00                        |
| 100 | .               | .                 | ,00            | ,00                        |
| 101 | .               | .                 | ,00            | ,00                        |
| 102 | .               | .                 | ,00            | ,00                        |
| 103 | .               | .                 | ,00            | ,00                        |
| 104 | .               | .                 | ,00            | ,00                        |
| 105 | .               | .                 | ,00            | ,00                        |
| 106 | .               | .                 | ,00            | ,00                        |
| 107 | .               | .                 | ,00            | ,00                        |
| 108 | .               | .                 | ,00            | ,00                        |
| 109 | .               | .                 | ,00            | ,00                        |
| 110 | .               | .                 | ,00            | ,00                        |
| 111 | .               | .                 | ,00            | ,00                        |

## RCC for Publication.sav

|     | CD3medianbis2k5unddarüber |
|-----|---------------------------|
| 75  | 1,00                      |
| 76  | ,00                       |
| 77  | .                         |
| 78  | 1,00                      |
| 79  | 1,00                      |
| 80  | 1,00                      |
| 81  | 1,00                      |
| 82  | 1,00                      |
| 83  | .                         |
| 84  | ,00                       |
| 85  | ,00                       |
| 86  | ,00                       |
| 87  | ,00                       |
| 88  | ,00                       |
| 89  | 1,00                      |
| 90  | 1,00                      |
| 91  | 1,00                      |
| 92  | 1,00                      |
| 93  | ,00                       |
| 94  | ,00                       |
| 95  | 1,00                      |
| 96  | ,00                       |
| 97  | 1,00                      |
| 98  | 1,00                      |
| 99  | ,00                       |
| 100 | ,00                       |
| 101 | ,00                       |
| 102 | 1,00                      |
| 103 | .                         |
| 104 | ,00                       |
| 105 | 1,00                      |
| 106 | ,00                       |
| 107 | 1,00                      |
| 108 | 1,00                      |
| 109 | 1,00                      |
| 110 | 1,00                      |
| 111 | ,00                       |

## RCC for Publication.sav

|     | Diagnosedatum_<br>Primär | Met_EarliestDatum | Last_contact_<br>Datum | AgeAtDiagnosis | Diagnosis_to<br>_lastcontact |
|-----|--------------------------|-------------------|------------------------|----------------|------------------------------|
| 112 | 20.10.2003               | .                 | 01.07.2012             | 68             | 104                          |
| 113 | 28.10.2003               | .                 | 01.01.2007             | 66             | 38                           |
| 114 | 28.10.2003               | .                 | 01.07.2012             | 45             | 104                          |
| 115 | 29.10.2003               | .                 | 01.08.2012             | 57             | 105                          |
| 116 | 15.11.2003               | 08.04.2008        | 01.08.2009             | 51             | 68                           |
| 117 | 19.11.2003               | .                 | 01.07.2012             | 58             | 103                          |
| 118 | 27.11.2003               | 10.08.2009        | 30.03.2011             | 56             | 88                           |
| 119 | 16.12.2003               | .                 | 20.07.2007             | 76             | 43                           |
| 120 | 17.12.2003               | .                 | 01.07.2012             | 72             | 102                          |
| 121 | 14.01.2004               | .                 | 23.05.2012             | 60             | 100                          |
| 122 | 12.05.2004               | 12.05.2004        | 06.02.2008             | 78             | 44                           |
| 123 | 14.05.2004               | .                 | 04.11.2008             | 54             | 53                           |
| 124 | 19.05.2004               | .                 | 19.08.2008             | 64             | 51                           |
| 125 | 26.05.2004               | 19.02.2009        | 12.07.2012             | 63             | 97                           |
| 126 | 27.05.2004               | 27.05.2004        | 07.01.2011             | 62             | 79                           |
| 127 | 03.06.2004               | .                 | 01.07.2012             | 66             | 96                           |
| 128 | 17.06.2004               | .                 | 01.07.2012             | 67             | 96                           |
| 129 | 21.06.2004               | 13.10.2005        | 04.07.2007             | 66             | 36                           |
| 130 | 15.07.2004               | 22.10.2004        | 09.03.2005             | 72             | 7                            |
| 131 | 15.07.2004               | .                 | 12.01.2008             | 40             | 41                           |
| 132 | 26.11.2004               | 28.04.2008        | 24.02.2012             | 75             | 86                           |
| 133 | 07.12.2004               | 07.12.2004        | 14.06.2006             | 66             | 18                           |
| 134 | 13.12.2004               | 13.12.2004        | 01.07.2012             | 70             | 90                           |
| 135 | 15.12.2004               | .                 | 15.02.2012             | 73             | 86                           |
| 136 | 14.01.2005               | .                 | 01.07.2012             | 67             | 89                           |
| 137 | 02.02.2005               | 02.02.2005        | 01.07.2012             | 44             | 88                           |
| 138 | 03.02.2005               | .                 | 06.11.2007             | 67             | 33                           |
| 139 | 18.02.2005               | .                 | 15.02.2012             | 44             | 83                           |
| 140 | 14.04.2005               | .                 | 01.07.2012             | 65             | 86                           |
| 141 | 11.05.2005               | 11.05.2005        | 26.10.2008             | 68             | 41                           |
| 142 | 03.06.2005               | .                 | 22.07.2010             | 63             | 61                           |
| 143 | 08.06.2005               | .                 | 07.07.2011             | 64             | 72                           |
| 144 | 01.07.2005               | .                 | 01.07.2012             | 48             | 84                           |
| 145 | 05.07.2005               | .                 | 01.08.2012             | 64             | 84                           |
| 146 | 11.07.2005               | 11.07.2005        | 30.12.2005             | 68             | 5                            |
| 147 | 19.07.2005               | .                 | 06.03.2012             | 52             | 79                           |
| 148 | 22.08.2005               | .                 | 01.08.2012             | 58             | 83                           |

## RCC for Publication.sav

|     | Survival_OS | Survival_DSS | Geschlecht | pT_grouped |
|-----|-------------|--------------|------------|------------|
| 112 | ,00         | ,00          | 2,00       | .          |
| 113 | ,00         | ,00          | 1,00       | .          |
| 114 | ,00         | ,00          | 1,00       | .          |
| 115 | ,00         | ,00          | 2,00       | .          |
| 116 | 1,00        | 1,00         | 2,00       | 2,00       |
| 117 | ,00         | ,00          | 2,00       | 1,00       |
| 118 | 1,00        | ,00          | 2,00       | 3,00       |
| 119 | 1,00        | ,00          | 2,00       | 3,00       |
| 120 | ,00         | ,00          | 2,00       | 1,00       |
| 121 | ,00         | ,00          | 1,00       | 1,00       |
| 122 | 1,00        | 1,00         | 2,00       | 3,00       |
| 123 | 1,00        | 1,00         | 2,00       | 1,00       |
| 124 | 1,00        | ,00          | 2,00       | 1,00       |
| 125 | ,00         | ,00          | 2,00       | 1,00       |
| 126 | 1,00        | ,00          | 2,00       | 2,00       |
| 127 | ,00         | ,00          | 1,00       | 1,00       |
| 128 | ,00         | ,00          | 1,00       | 1,00       |
| 129 | 1,00        | 1,00         | 2,00       | 1,00       |
| 130 | 1,00        | ,00          | 1,00       | 3,00       |
| 131 | 1,00        | ,00          | 2,00       | 3,00       |
| 132 | 1,00        | ,00          | 2,00       | 1,00       |
| 133 | 1,00        | 1,00         | 2,00       | 2,00       |
| 134 | ,00         | ,00          | 1,00       | 3,00       |
| 135 | ,00         | ,00          | 2,00       | 1,00       |
| 136 | ,00         | ,00          | 1,00       | 1,00       |
| 137 | ,00         | ,00          | 2,00       | 3,00       |
| 138 | 1,00        | ,00          | 1,00       | 3,00       |
| 139 | ,00         | ,00          | 2,00       | 1,00       |
| 140 | ,00         | ,00          | 1,00       | 3,00       |
| 141 | 1,00        | 1,00         | 1,00       | 1,00       |
| 142 | 1,00        | ,00          | 2,00       | 3,00       |
| 143 | ,00         | ,00          | 1,00       | 1,00       |
| 144 | ,00         | ,00          | 1,00       | 1,00       |
| 145 | ,00         | ,00          | 2,00       | 1,00       |
| 146 | 1,00        | ,00          | 1,00       | 3,00       |
| 147 | ,00         | ,00          | 2,00       | 1,00       |
| 148 | ,00         | ,00          | 1,00       | 1,00       |

## RCC for Publication.sav

|     | Morphology_coded | Grading_Paktuell<br>April2013 | ECOG | Prop_PD1 |
|-----|------------------|-------------------------------|------|----------|
| 112 | 1,00             | 2                             | .    | ,00      |
| 113 | 1,00             | 2                             | .    | ,00      |
| 114 | 1,00             | 2                             | .    | ,00      |
| 115 | 1,00             | 2                             | .    | ,00      |
| 116 | 1,00             | 1                             | .    | ,00      |
| 117 | 1,00             | 2                             | .    | ,00      |
| 118 | 1,00             | 2                             | .    | ,00      |
| 119 | 1,00             | 3                             | 1    | ,00      |
| 120 | 1,00             | 2                             | 0    | ,00      |
| 121 | 1,00             | 2                             | 0    | ,00      |
| 122 | 1,00             | 2                             | 1    | ,00      |
| 123 | 1,00             | 2                             | 1    | ,00      |
| 124 | 1,00             | 2                             | 1    | ,00      |
| 125 | 1,00             | 3                             | 0    | ,00      |
| 126 | 1,00             | 3                             | 0    | ,00      |
| 127 | 1,00             | 2                             | 0    | ,00      |
| 128 | 1,00             | 2                             | 1    | ,00      |
| 129 | 1,00             | 2                             | 1    | ,00      |
| 130 | 1,00             | 3                             | 1    | ,00      |
| 131 | 1,00             | 2                             | 0    | ,00      |
| 132 | 1,00             | 2                             | 0    | ,00      |
| 133 | 1,00             | 3                             | 0    | ,00      |
| 134 | 1,00             | 2                             | .    | ,00      |
| 135 | 1,00             | 2                             | 1    | ,00      |
| 136 | 1,00             | 2                             | 0    | ,00      |
| 137 | 1,00             | 3                             | 0    | ,00      |
| 138 | 1,00             | 2                             | 0    | ,00      |
| 139 | 1,00             | 1                             | 0    | ,00      |
| 140 | 1,00             | 2                             | 0    | ,00      |
| 141 | 1,00             | 2                             | 0    | ,00      |
| 142 | 1,00             | 2                             | 1    | ,00      |
| 143 | 1,00             | 2                             | 1    | ,00      |
| 144 | 1,00             | 1                             | 0    | ,00      |
| 145 | 1,00             | 2                             | 1    | ,00      |
| 146 | 1,00             | 3                             | 1    | ,00      |
| 147 | 1,00             | 2                             | 1    | ,00      |
| 148 | 1,00             | 2                             | 1    | ,00      |

## RCC for Publication.sav

|     | Intens_PD1 | PD1IRS | Prop_PDL1_TU | Intens_PDL1_TU | PDL1_TU_IRS |
|-----|------------|--------|--------------|----------------|-------------|
| 112 | .          | ,00    | ,00          | .              | ,00         |
| 113 | .          | ,00    | ,00          | .              | ,00         |
| 114 | .          | ,00    | ,00          | .              | ,00         |
| 115 | .          | ,00    | ,00          | .              | ,00         |
| 116 | .          | ,00    | ,00          | .              | ,00         |
| 117 | .          | ,00    | ,00          | .              | ,00         |
| 118 | .          | ,00    | ,00          | .              | ,00         |
| 119 | .          | ,00    | ,00          | .              | ,00         |
| 120 | .          | ,00    | ,00          | .              | ,00         |
| 121 | .          | ,00    | ,00          | .              | ,00         |
| 122 | .          | ,00    | ,00          | .              | ,00         |
| 123 | .          | ,00    | ,00          | .              | ,00         |
| 124 | .          | ,00    | ,00          | .              | ,00         |
| 125 | .          | ,00    | ,00          | .              | ,00         |
| 126 | .          | ,00    | ,00          | .              | ,00         |
| 127 | .          | ,00    | ,00          | .              | ,00         |
| 128 | .          | ,00    | ,00          | .              | ,00         |
| 129 | .          | ,00    | ,00          | .              | ,00         |
| 130 | .          | ,00    | ,00          | .              | ,00         |
| 131 | .          | ,00    | ,00          | .              | ,00         |
| 132 | .          | ,00    | ,00          | .              | ,00         |
| 133 | .          | ,00    | ,00          | .              | ,00         |
| 134 | .          | ,00    | ,00          | .              | ,00         |
| 135 | .          | ,00    | ,00          | .              | ,00         |
| 136 | .          | ,00    | ,00          | .              | ,00         |
| 137 | .          | ,00    | ,00          | .              | ,00         |
| 138 | .          | ,00    | ,00          | .              | ,00         |
| 139 | .          | ,00    | ,00          | .              | ,00         |
| 140 | .          | ,00    | ,00          | .              | ,00         |
| 141 | .          | ,00    | ,00          | .              | ,00         |
| 142 | .          | ,00    | ,00          | .              | ,00         |
| 143 | .          | ,00    | ,00          | .              | ,00         |
| 144 | .          | ,00    | ,00          | .              | ,00         |
| 145 | .          | ,00    | ,00          | .              | ,00         |
| 146 | .          | ,00    | ,00          | .              | ,00         |
| 147 | .          | ,00    | ,00          | .              | ,00         |
| 148 | .          | ,00    | ,00          | .              | ,00         |

## RCC for Publication.sav

|     | Prop_PDL1_Lymph | Intens_PDL1_Lymph | PDL1_Lymph_IRS | andreasProp_Lymph_CTLA4_TU |
|-----|-----------------|-------------------|----------------|----------------------------|
| 112 | .               | .                 | ,00            | ,00                        |
| 113 | .               | .                 | ,00            | ,00                        |
| 114 | .               | .                 | ,00            | ,00                        |
| 115 | .               | .                 | ,00            | 2,00                       |
| 116 | .               | .                 | ,00            | ,00                        |
| 117 | .               | .                 | ,00            | ,00                        |
| 118 | .               | .                 | ,00            | ,00                        |
| 119 | .               | .                 | ,00            | ,00                        |
| 120 | .               | .                 | ,00            | ,00                        |
| 121 | .               | .                 | ,00            | ,00                        |
| 122 | .               | .                 | ,00            | ,00                        |
| 123 | .               | .                 | ,00            | ,00                        |
| 124 | .               | .                 | ,00            | ,00                        |
| 125 | .               | .                 | ,00            | ,00                        |
| 126 | .               | .                 | ,00            | ,00                        |
| 127 | .               | .                 | ,00            | ,00                        |
| 128 | .               | .                 | ,00            | ,00                        |
| 129 | .               | .                 | ,00            | ,00                        |
| 130 | .               | .                 | ,00            | ,00                        |
| 131 | .               | .                 | ,00            | ,00                        |
| 132 | .               | .                 | ,00            | ,00                        |
| 133 | .               | .                 | ,00            | ,00                        |
| 134 | .               | .                 | ,00            | ,00                        |
| 135 | .               | .                 | ,00            | ,00                        |
| 136 | .               | .                 | ,00            | ,00                        |
| 137 | .               | .                 | ,00            | ,00                        |
| 138 | .               | .                 | ,00            | ,00                        |
| 139 | .               | .                 | ,00            | ,00                        |
| 140 | .               | .                 | ,00            | ,00                        |
| 141 | .               | .                 | ,00            | ,00                        |
| 142 | .               | .                 | ,00            | ,00                        |
| 143 | .               | .                 | ,00            | ,00                        |
| 144 | .               | .                 | ,00            | ,00                        |
| 145 | .               | .                 | ,00            | ,00                        |
| 146 | .               | .                 | ,00            | ,00                        |
| 147 | .               | .                 | ,00            | ,00                        |
| 148 | .               | .                 | ,00            | ,00                        |

## RCC for Publication.sav

|     | CD3medianbis2k5unddarüber |
|-----|---------------------------|
| 112 | ,00                       |
| 113 | 1,00                      |
| 114 | ,00                       |
| 115 | 1,00                      |
| 116 | 1,00                      |
| 117 | 1,00                      |
| 118 | ,00                       |
| 119 | ,00                       |
| 120 | ,00                       |
| 121 | 1,00                      |
| 122 | ,00                       |
| 123 | ,00                       |
| 124 | ,00                       |
| 125 | 1,00                      |
| 126 | 1,00                      |
| 127 | 1,00                      |
| 128 | ,00                       |
| 129 | ,00                       |
| 130 | ,00                       |
| 131 | ,00                       |
| 132 | 1,00                      |
| 133 | 1,00                      |
| 134 | 1,00                      |
| 135 | 1,00                      |
| 136 | 1,00                      |
| 137 | 1,00                      |
| 138 | ,00                       |
| 139 | ,00                       |
| 140 | ,00                       |
| 141 | ,00                       |
| 142 | ,00                       |
| 143 | ,00                       |
| 144 | 1,00                      |
| 145 | 1,00                      |
| 146 | ,00                       |
| 147 | ,00                       |
| 148 | ,00                       |



## RCC for Publication.sav

|     | Diagnosedatum_<br>Primär | Met_EarliestDatum | Last_contact_<br>Datum | AgeAtDiagnosis | Diagnosis_to<br>_lastcontact |
|-----|--------------------------|-------------------|------------------------|----------------|------------------------------|
| 149 | 23.08.2005               | .                 | 18.08.2006             | 65             | 11                           |
| 150 | 08.09.2005               | .                 | 01.08.2012             | 63             | 82                           |
| 151 | 08.09.2005               | .                 | 01.08.2012             | 72             | 82                           |
| 152 | 11.10.2005               | 26.05.2008        | 16.02.2010             | 80             | 52                           |
| 153 | 14.10.2005               | .                 | 06.06.2012             | 74             | 79                           |
| 154 | 18.10.2005               | .                 | 01.07.2012             | 62             | 80                           |
| 155 | 03.11.2005               | .                 | 01.07.2012             | 66             | 79                           |
| 156 | 14.11.2005               | .                 | 10.05.2012             | 48             | 77                           |
| 157 | 13.12.2005               | 09.04.2009        | 10.05.2012             | 65             | 76                           |
| 158 | 28.12.2005               | 28.12.2005        | 12.03.2006             | 77             | 2                            |
| 159 | 15.01.2006               | .                 | 22.03.2007             | 61             | 14                           |
| 160 | 15.01.2006               | .                 | 01.07.2012             | 76             | 77                           |
| 161 | 24.01.2006               | 15.11.2006        | 21.12.2006             | 67             | 10                           |
| 162 | 27.01.2006               | .                 | 01.08.2012             | 66             | 78                           |
| 163 | 06.02.2006               | .                 | 01.07.2012             | 56             | 76                           |
| 164 | 21.03.2006               | .                 | 01.08.2012             | 79             | 76                           |
| 165 | 10.04.2006               | .                 | 01.09.2011             | 65             | 64                           |
| 166 | 18.04.2006               | 15.08.2007        | 19.04.2012             | 71             | 72                           |
| 167 | 24.04.2006               | 24.04.2006        | 08.12.2006             | 69             | 7                            |
| 168 | 26.04.2006               | .                 | 20.04.2009             | 53             | 35                           |
| 169 | 02.05.2006               | 02.05.2006        | 22.04.2007             | 66             | 11                           |
| 170 | 05.05.2006               | .                 | 11.06.2012             | 68             | 73                           |
| 171 | 16.05.2006               | .                 | 01.07.2012             | 69             | 73                           |
| 172 | 08.06.2006               | .                 | 01.07.2012             | 50             | 72                           |
| 173 | 14.06.2006               | .                 | 12.05.2012             | 83             | 70                           |
| 174 | 19.06.2006               | .                 | 08.05.2012             | 80             | 70                           |
| 175 | 24.07.2006               | .                 | 01.07.2012             | 56             | 71                           |
| 176 | 08.12.2006               | 19.06.2008        | 14.08.2009             | 54             | 32                           |
| 177 | 15.12.2006               | 31.07.2008        | 16.11.2008             | 62             | 23                           |
| 178 | 29.12.2006               | .                 | 01.07.2012             | 55             | 66                           |
| 179 | 07.02.2007               | .                 | 08.05.2012             | 68             | 63                           |
| 180 | 19.02.2007               | .                 | 01.08.2012             | 64             | 65                           |
| 181 | 09.03.2007               | .                 | 01.07.2012             | 56             | 63                           |
| 182 | 15.04.2007               | .                 | 01.08.2012             | 67             | 63                           |
| 183 | 18.04.2007               | 10.08.2011        | 01.07.2012             | 65             | 62                           |
| 184 | 03.05.2007               | .                 | 01.07.2012             | 64             | 61                           |
| 185 | 09.05.2007               | .                 | 01.07.2012             | 66             | 61                           |

RCC for Publication.sav

|     | Survival_OS | Survival_DSS | Geschlecht | pT_grouped |
|-----|-------------|--------------|------------|------------|
| 149 | 1,00        | ,00          | 2,00       | 1,00       |
| 150 | ,00         | ,00          | 1,00       | 1,00       |
| 151 | ,00         | ,00          | 2,00       | 3,00       |
| 152 | 1,00        | 1,00         | 2,00       | 1,00       |
| 153 | ,00         | ,00          | 2,00       | 3,00       |
| 154 | ,00         | ,00          | 2,00       | .          |
| 155 | ,00         | ,00          | 1,00       | 1,00       |
| 156 | ,00         | ,00          | 2,00       | 1,00       |
| 157 | ,00         | ,00          | 2,00       | 3,00       |
| 158 | 1,00        | 1,00         | 2,00       | 1,00       |
| 159 | ,00         | ,00          | 2,00       | 1,00       |
| 160 | ,00         | ,00          | 1,00       | 3,00       |
| 161 | 1,00        | 1,00         | 1,00       | 2,00       |
| 162 | ,00         | ,00          | 2,00       | 1,00       |
| 163 | ,00         | ,00          | 2,00       | 1,00       |
| 164 | ,00         | ,00          | 1,00       | 1,00       |
| 165 | 1,00        | ,00          | 2,00       | 1,00       |
| 166 | ,00         | ,00          | 2,00       | 2,00       |
| 167 | 1,00        | 1,00         | 2,00       | 3,00       |
| 168 | 1,00        | ,00          | 2,00       | 3,00       |
| 169 | 1,00        | ,00          | 2,00       | 3,00       |
| 170 | ,00         | ,00          | 2,00       | 1,00       |
| 171 | ,00         | ,00          | 2,00       | 1,00       |
| 172 | ,00         | ,00          | 2,00       | 3,00       |
| 173 | ,00         | ,00          | 1,00       | 3,00       |
| 174 | ,00         | ,00          | 2,00       | 1,00       |
| 175 | ,00         | ,00          | 2,00       | 1,00       |
| 176 | 1,00        | 1,00         | 2,00       | 2,00       |
| 177 | 1,00        | 1,00         | 1,00       | 3,00       |
| 178 | ,00         | ,00          | 1,00       | 2,00       |
| 179 | ,00         | ,00          | 1,00       | 1,00       |
| 180 | ,00         | ,00          | 1,00       | 1,00       |
| 181 | ,00         | ,00          | 2,00       | 1,00       |
| 182 | ,00         | ,00          | 1,00       | 1,00       |
| 183 | ,00         | ,00          | 2,00       | 3,00       |
| 184 | ,00         | ,00          | 1,00       | 1,00       |
| 185 | ,00         | ,00          | 2,00       | 3,00       |

## RCC for Publication.sav

|     | Morphology_coded | Grading_Paktuell<br>April2013 | ECOG | Prop_PD1 |
|-----|------------------|-------------------------------|------|----------|
| 149 | 1,00             | 2                             | 0    | ,00      |
| 150 | 1,00             | 2                             | 0    | ,00      |
| 151 | 1,00             | 2                             | 0    | ,00      |
| 152 | 1,00             | 3                             | 0    | ,00      |
| 153 | 1,00             | 2                             | 0    | ,00      |
| 154 | 1,00             | 3                             | 0    | ,00      |
| 155 | 1,00             | 3                             | 0    | ,00      |
| 156 | 1,00             | 1                             | 0    | ,00      |
| 157 | 1,00             | 2                             | .    | ,00      |
| 158 | 1,00             | 3                             | 0    | ,00      |
| 159 | 1,00             | 2                             | 0    | ,00      |
| 160 | 1,00             | 2                             | 0    | ,00      |
| 161 | 1,00             | 3                             | 0    | ,00      |
| 162 | 1,00             | 3                             | 0    | ,00      |
| 163 | 1,00             | 2                             | 0    | ,00      |
| 164 | 1,00             | 2                             | 0    | ,00      |
| 165 | 1,00             | 2                             | 0    | ,00      |
| 166 | 1,00             | 3                             | 0    | ,00      |
| 167 | 1,00             | 3                             | 2    | ,00      |
| 168 | 1,00             | 3                             | 1    | ,00      |
| 169 | 1,00             | 3                             | 0    | ,00      |
| 170 | 1,00             | 2                             | 1    | ,00      |
| 171 | 1,00             | 2                             | 2    | ,00      |
| 172 | 1,00             | 2                             | 0    | ,00      |
| 173 | 1,00             | 2                             | 0    | ,00      |
| 174 | 1,00             | 1                             | 0    | ,00      |
| 175 | 1,00             | 3                             | 0    | ,00      |
| 176 | 1,00             | 3                             | 0    | ,00      |
| 177 | 1,00             | 3                             | 1    | ,00      |
| 178 | 1,00             | 2                             | 0    | ,00      |
| 179 | 1,00             | 2                             | 1    | ,00      |
| 180 | 1,00             | 2                             | 0    | ,00      |
| 181 | 1,00             | 2                             | 0    | ,00      |
| 182 | 1,00             | 1                             | 0    | ,00      |
| 183 | 1,00             | 2                             | 0    | ,00      |
| 184 | 1,00             | 2                             | 0    | ,00      |
| 185 | 1,00             | 2                             | 0    | ,00      |

## RCC for Publication.sav

|     | Intens_PD1 | PD1IRS | Prop_PDL1_TU | Intens_PDL1_TU | PDL1_TU_IRS |
|-----|------------|--------|--------------|----------------|-------------|
| 149 | .          | ,00    | ,00          | .              | ,00         |
| 150 | .          | ,00    | ,00          | .              | ,00         |
| 151 | .          | ,00    | ,00          | .              | ,00         |
| 152 | .          | ,00    | ,00          | .              | ,00         |
| 153 | .          | ,00    | ,00          | .              | ,00         |
| 154 | .          | ,00    | ,00          | .              | ,00         |
| 155 | .          | ,00    | ,00          | .              | ,00         |
| 156 | .          | ,00    | ,00          | .              | ,00         |
| 157 | .          | ,00    | ,00          | .              | ,00         |
| 158 | .          | ,00    | ,00          | .              | ,00         |
| 159 | .          | ,00    | ,00          | .              | ,00         |
| 160 | .          | ,00    | ,00          | .              | ,00         |
| 161 | .          | ,00    | ,00          | .              | ,00         |
| 162 | .          | ,00    | ,00          | .              | ,00         |
| 163 | .          | ,00    | ,00          | .              | ,00         |
| 164 | .          | ,00    | ,00          | .              | ,00         |
| 165 | .          | ,00    | ,00          | .              | ,00         |
| 166 | .          | ,00    | ,00          | .              | ,00         |
| 167 | .          | ,00    | ,00          | .              | ,00         |
| 168 | .          | ,00    | ,00          | .              | ,00         |
| 169 | .          | ,00    | ,00          | .              | ,00         |
| 170 | .          | ,00    | ,00          | .              | ,00         |
| 171 | .          | ,00    | ,00          | .              | ,00         |
| 172 | .          | ,00    | ,00          | .              | ,00         |
| 173 | .          | ,00    | ,00          | .              | ,00         |
| 174 | .          | ,00    | ,00          | .              | ,00         |
| 175 | .          | ,00    | ,00          | .              | ,00         |
| 176 | .          | ,00    | ,00          | .              | ,00         |
| 177 | .          | ,00    | ,00          | .              | ,00         |
| 178 | .          | ,00    | ,00          | .              | ,00         |
| 179 | .          | ,00    | ,00          | .              | ,00         |
| 180 | .          | ,00    | ,00          | .              | ,00         |
| 181 | .          | ,00    | ,00          | .              | ,00         |
| 182 | .          | ,00    | ,00          | .              | ,00         |
| 183 | .          | ,00    | ,00          | .              | ,00         |
| 184 | .          | ,00    | ,00          | .              | ,00         |
| 185 | .          | ,00    | ,00          | .              | ,00         |

## RCC for Publication.sav

|     | Prop_PDL1_Lymph | Intens_PDL1_Lymph | PDL1_Lymph_IRS | andreasProp_Lymph_CTLA4_TU |
|-----|-----------------|-------------------|----------------|----------------------------|
| 149 | .               | .                 | ,00            | ,00                        |
| 150 | .               | .                 | ,00            | ,00                        |
| 151 | .               | .                 | ,00            | ,00                        |
| 152 | .               | .                 | ,00            | ,00                        |
| 153 | .               | .                 | ,00            | ,00                        |
| 154 | .               | .                 | ,00            | ,00                        |
| 155 | .               | .                 | ,00            | ,00                        |
| 156 | .               | .                 | ,00            | ,00                        |
| 157 | .               | .                 | ,00            | ,00                        |
| 158 | .               | .                 | ,00            | ,00                        |
| 159 | .               | .                 | ,00            | ,00                        |
| 160 | .               | .                 | ,00            | ,00                        |
| 161 | .               | .                 | ,00            | 2,00                       |
| 162 | .               | .                 | ,00            | ,00                        |
| 163 | .               | .                 | ,00            | ,00                        |
| 164 | .               | .                 | ,00            | 1,00                       |
| 165 | .               | .                 | ,00            | ,00                        |
| 166 | .               | .                 | ,00            | ,00                        |
| 167 | .               | .                 | ,00            | ,00                        |
| 168 | .               | .                 | ,00            | ,00                        |
| 169 | .               | .                 | ,00            | ,00                        |
| 170 | .               | .                 | ,00            | ,00                        |
| 171 | .               | .                 | ,00            | ,00                        |
| 172 | .               | .                 | ,00            | ,00                        |
| 173 | .               | .                 | ,00            | ,00                        |
| 174 | .               | .                 | ,00            | ,00                        |
| 175 | .               | .                 | ,00            | ,00                        |
| 176 | .               | .                 | ,00            | ,00                        |
| 177 | .               | .                 | ,00            | ,00                        |
| 178 | .               | .                 | ,00            | ,00                        |
| 179 | .               | .                 | ,00            | ,00                        |
| 180 | .               | .                 | ,00            | ,00                        |
| 181 | .               | .                 | ,00            | ,00                        |
| 182 | .               | .                 | ,00            | ,00                        |
| 183 | .               | .                 | ,00            | ,00                        |
| 184 | .               | .                 | ,00            | ,00                        |
| 185 | .               | .                 | ,00            | ,00                        |

RCC for Publication.sav

|     | CD3medianbis2k5unddarüber |
|-----|---------------------------|
| 149 | 1,00                      |
| 150 | ,00                       |
| 151 | ,00                       |
| 152 | ,00                       |
| 153 | ,00                       |
| 154 | ,00                       |
| 155 | ,00                       |
| 156 | 1,00                      |
| 157 | ,00                       |
| 158 | 1,00                      |
| 159 | .                         |
| 160 | 1,00                      |
| 161 | ,00                       |
| 162 | .                         |
| 163 | 1,00                      |
| 164 | ,00                       |
| 165 | 1,00                      |
| 166 | 1,00                      |
| 167 | 1,00                      |
| 168 | 1,00                      |
| 169 | 1,00                      |
| 170 | 1,00                      |
| 171 | 1,00                      |
| 172 | ,00                       |
| 173 | ,00                       |
| 174 | 1,00                      |
| 175 | ,00                       |
| 176 | ,00                       |
| 177 | 1,00                      |
| 178 | 1,00                      |
| 179 | ,00                       |
| 180 | ,00                       |
| 181 | ,00                       |
| 182 | 1,00                      |
| 183 | 1,00                      |
| 184 | ,00                       |
| 185 | 1,00                      |

## RCC for Publication.sav

|     | Diagnosedatum_<br>Primär | Met_EarliestDatum | Last_contact_<br>Datum | AgeAtDiagnosis | Diagnosis_to<br>_lastcontact |
|-----|--------------------------|-------------------|------------------------|----------------|------------------------------|
| 186 | 15.05.2007               | .                 | 01.08.2012             | 79             | 62                           |
| 187 | 09.06.2007               | 01.06.2009        | 01.06.2009             | 76             | 23                           |
| 188 | 14.06.2007               | .                 | 02.03.2012             | 65             | 56                           |
| 189 | 21.06.2007               | .                 | 01.07.2012             | 66             | 60                           |
| 190 | 11.07.2007               | .                 | 01.07.2012             | 84             | 59                           |
| 191 | 20.07.2007               | 19.02.2010        | 27.05.2011             | 61             | 46                           |
| 192 | 25.08.2007               | .                 | 02.03.2009             | 68             | 18                           |
| 193 | 05.09.2007               | .                 | 06.06.2012             | 81             | 57                           |
| 194 | 11.09.2007               | .                 | 01.07.2012             | 59             | 57                           |
| 195 | 14.09.2007               | .                 | 01.07.2012             | 74             | 57                           |
| 196 | 27.09.2007               | 10.02.2008        | 01.07.2008             | 50             | 9                            |
| 197 | 17.10.2007               | 17.10.2007        | 23.03.2008             | 76             | 5                            |
| 198 | 15.11.2007               | 14.03.2008        | 28.06.2008             | 78             | 7                            |
| 199 | 27.11.2007               | .                 | 01.07.2012             | 58             | 55                           |
| 200 | 03.12.2007               | .                 | 12.04.2012             | 50             | 52                           |
| 201 | 03.12.2007               | .                 | 09.09.2009             | 62             | 21                           |
| 202 | 14.12.2007               | .                 | 01.07.2012             | 73             | 54                           |
| 203 | 04.01.2008               | 29.05.2008        | 16.05.2012             | 56             | 52                           |
| 204 | 23.01.2008               | .                 | 01.07.2012             | 70             | 53                           |
| 205 | 03.02.2008               | 07.04.2010        | 19.06.2010             | 70             | 28                           |
| 206 | 13.02.2008               | .                 | 01.07.2012             | 48             | 52                           |
| 207 | 14.02.2008               | .                 | 06.06.2012             | 74             | 51                           |
| 208 | 06.03.2008               | 06.03.2008        | 03.03.2009             | 45             | 11                           |
| 209 | 12.03.2008               | .                 | 01.07.2012             | 65             | 51                           |
| 210 | 14.03.2008               | 14.03.2008        | 30.04.2008             | 41             | 1                            |
| 211 | 19.03.2008               | .                 | 01.02.2012             | 62             | 46                           |
| 212 | 09.05.2008               | .                 | 04.07.2012             | 52             | 49                           |
| 213 | 13.05.2008               | 09.09.2010        | 21.05.2012             | 47             | 48                           |
| 214 | 27.05.2008               | .                 | 01.08.2012             | 73             | 50                           |
| 215 | 03.06.2008               | .                 | 23.05.2012             | 67             | 47                           |
| 216 | 23.07.2008               | .                 | 16.02.2012             | 75             | 42                           |
| 217 | 11.08.2008               | .                 | 19.04.2009             | 76             | 8                            |
| 218 | 26.08.2008               | .                 | 01.08.2012             | 73             | 47                           |
| 219 | 27.08.2008               | .                 | 27.02.2012             | 73             | 42                           |
| 220 | 18.09.2008               | .                 | 11.06.2009             | 73             | 8                            |
| 221 | 08.10.2008               | .                 | 01.08.2012             | 83             | 45                           |
| 222 | 10.10.2008               | .                 | 29.01.2009             | 70             | 3                            |

RCC for Publication.sav

|     | Survival_OS | Survival_DSS | Geschlecht | pT_grouped |
|-----|-------------|--------------|------------|------------|
| 186 | ,00         | ,00          | 1,00       | 1,00       |
| 187 | 1,00        | ,00          | 1,00       | 2,00       |
| 188 | ,00         | ,00          | 2,00       | 2,00       |
| 189 | ,00         | ,00          | 1,00       | 1,00       |
| 190 | ,00         | ,00          | 1,00       | 1,00       |
| 191 | 1,00        | ,00          | 2,00       | 3,00       |
| 192 | 1,00        | ,00          | 2,00       | 1,00       |
| 193 | ,00         | ,00          | 2,00       | 1,00       |
| 194 | ,00         | ,00          | 1,00       | 3,00       |
| 195 | ,00         | ,00          | 1,00       | 1,00       |
| 196 | 1,00        | 1,00         | 2,00       | 2,00       |
| 197 | 1,00        | 1,00         | 1,00       | 3,00       |
| 198 | 1,00        | 1,00         | 2,00       | 3,00       |
| 199 | ,00         | ,00          | 2,00       | 1,00       |
| 200 | ,00         | ,00          | 2,00       | 1,00       |
| 201 | 1,00        | ,00          | 2,00       | 3,00       |
| 202 | ,00         | ,00          | 1,00       | 1,00       |
| 203 | ,00         | ,00          | 1,00       | 2,00       |
| 204 | ,00         | ,00          | 1,00       | 1,00       |
| 205 | 1,00        | ,00          | 1,00       | 3,00       |
| 206 | ,00         | ,00          | 1,00       | 1,00       |
| 207 | ,00         | ,00          | 1,00       | 1,00       |
| 208 | 1,00        | 1,00         | 2,00       | 3,00       |
| 209 | ,00         | ,00          | 1,00       | 1,00       |
| 210 | 1,00        | 1,00         | 2,00       | 2,00       |
| 211 | ,00         | ,00          | 1,00       | 1,00       |
| 212 | ,00         | ,00          | 1,00       | 3,00       |
| 213 | ,00         | ,00          | 2,00       | 2,00       |
| 214 | ,00         | ,00          | 2,00       | 1,00       |
| 215 | ,00         | ,00          | 2,00       | 1,00       |
| 216 | ,00         | ,00          | 2,00       | 1,00       |
| 217 | 1,00        | ,00          | 2,00       | 3,00       |
| 218 | ,00         | ,00          | 1,00       | 1,00       |
| 219 | ,00         | ,00          | 1,00       | 1,00       |
| 220 | 1,00        | ,00          | 2,00       | 3,00       |
| 221 | ,00         | ,00          | 2,00       | 1,00       |
| 222 | 1,00        | ,00          | 2,00       | 3,00       |



## RCC for Publication.sav

|     | Morphology_coded | Grading_Paktuell<br>April2013 | ECOG | Prop_PD1 |
|-----|------------------|-------------------------------|------|----------|
| 186 | 1,00             | 2                             | 0    | ,00      |
| 187 | 1,00             | 1                             | 0    | ,00      |
| 188 | 1,00             | 2                             | 0    | ,00      |
| 189 | 1,00             | 1                             | 0    | ,00      |
| 190 | 1,00             | 2                             | 1    | ,00      |
| 191 | 1,00             | 3                             | 0    | ,00      |
| 192 | 1,00             | 2                             | 2    | ,00      |
| 193 | 1,00             | 1                             | 0    | ,00      |
| 194 | 1,00             | 1                             | 0    | ,00      |
| 195 | 1,00             | 2                             | 0    | ,00      |
| 196 | 1,00             | 3                             | 0    | ,00      |
| 197 | 1,00             | 3                             | 0    | ,00      |
| 198 | 1,00             | 2                             | 0    | ,00      |
| 199 | 1,00             | 1                             | 0    | ,00      |
| 200 | 1,00             | 1                             | 0    | ,00      |
| 201 | 1,00             | 3                             | .    | ,00      |
| 202 | 1,00             | 2                             | 0    | ,00      |
| 203 | 1,00             | 3                             | 0    | ,00      |
| 204 | 1,00             | 2                             | 0    | ,00      |
| 205 | 1,00             | 2                             | 0    | ,00      |
| 206 | 1,00             | 2                             | 0    | ,00      |
| 207 | 1,00             | 2                             | 0    | ,00      |
| 208 | 1,00             | 3                             | 0    | ,00      |
| 209 | 1,00             | 2                             | 0    | ,00      |
| 210 | 1,00             | 3                             | 0    | ,00      |
| 211 | 1,00             | 1                             | 0    | ,00      |
| 212 | 1,00             | 2                             | 0    | ,00      |
| 213 | 1,00             | 3                             | 0    | 1,00     |
| 214 | 1,00             | 1                             | 0    | ,00      |
| 215 | 1,00             | 1                             | 0    | ,00      |
| 216 | 1,00             | 2                             | 0    | ,00      |
| 217 | 1,00             | 2                             | 0    | ,00      |
| 218 | 1,00             | 1                             | 0    | ,00      |
| 219 | 1,00             | 1                             | 0    | ,00      |
| 220 | 1,00             | 3                             | 3    | ,00      |
| 221 | 1,00             | 2                             | 1    | ,00      |
| 222 | 1,00             | 2                             | 1    | ,00      |

RCC for Publication.sav

|     | Intens_PD1 | PD1IRS | Prop_PDL1_TU | Intens_PDL1_TU | PDL1_TU_IRS |
|-----|------------|--------|--------------|----------------|-------------|
| 186 | .          | ,00    | ,00          | .              | ,00         |
| 187 | .          | ,00    | ,00          | .              | ,00         |
| 188 | .          | ,00    | ,00          | .              | ,00         |
| 189 | .          | ,00    | ,00          | .              | ,00         |
| 190 | .          | ,00    | ,00          | .              | ,00         |
| 191 | .          | ,00    | ,00          | .              | ,00         |
| 192 | .          | ,00    | ,00          | .              | ,00         |
| 193 | .          | ,00    | ,00          | .              | ,00         |
| 194 | .          | ,00    | ,00          | .              | ,00         |
| 195 | .          | ,00    | ,00          | .              | ,00         |
| 196 | .          | ,00    | ,00          | .              | ,00         |
| 197 | .          | ,00    | ,00          | .              | ,00         |
| 198 | .          | ,00    | ,00          | .              | ,00         |
| 199 | .          | ,00    | ,00          | .              | ,00         |
| 200 | .          | ,00    | ,00          | .              | ,00         |
| 201 | .          | ,00    | ,00          | .              | ,00         |
| 202 | .          | ,00    | ,00          | .              | ,00         |
| 203 | .          | ,00    | ,00          | .              | ,00         |
| 204 | .          | ,00    | ,00          | .              | ,00         |
| 205 | .          | ,00    | ,00          | .              | ,00         |
| 206 | .          | ,00    | ,00          | .              | ,00         |
| 207 | .          | ,00    | ,00          | .              | ,00         |
| 208 | .          | ,00    | ,00          | .              | ,00         |
| 209 | .          | ,00    | ,00          | .              | ,00         |
| 210 | .          | ,00    | ,00          | .              | ,00         |
| 211 | .          | ,00    | ,00          | .              | ,00         |
| 212 | .          | ,00    | ,00          | .              | ,00         |
| 213 | 1,00       | 1,00   | 3,00         | 2,00           | 6,00        |
| 214 | .          | ,00    | ,00          | .              | ,00         |
| 215 | .          | ,00    | ,00          | .              | ,00         |
| 216 | .          | ,00    | ,00          | .              | ,00         |
| 217 | .          | ,00    | ,00          | .              | ,00         |
| 218 | .          | ,00    | ,00          | .              | ,00         |
| 219 | .          | ,00    | ,00          | .              | ,00         |
| 220 | .          | ,00    | ,00          | .              | ,00         |
| 221 | .          | ,00    | ,00          | .              | ,00         |
| 222 | .          | ,00    | ,00          | .              | ,00         |

## RCC for Publication.sav

|     | Prop_PDL1_Lymph | Intens_PDL1_Lymph | PDL1_Lymph_IRS | andreasProp_Lymph_CTLA4_TU |
|-----|-----------------|-------------------|----------------|----------------------------|
| 186 | .               | .                 | ,00            | ,00                        |
| 187 | .               | .                 | ,00            | ,00                        |
| 188 | .               | .                 | ,00            | ,00                        |
| 189 | .               | .                 | ,00            | ,00                        |
| 190 | .               | .                 | ,00            | ,00                        |
| 191 | .               | .                 | ,00            | ,00                        |
| 192 | .               | .                 | ,00            | ,00                        |
| 193 | .               | .                 | ,00            | ,00                        |
| 194 | .               | .                 | ,00            | ,00                        |
| 195 | .               | .                 | ,00            | ,00                        |
| 196 | .               | .                 | ,00            | ,00                        |
| 197 | .               | .                 | ,00            | ,00                        |
| 198 | .               | .                 | ,00            | ,00                        |
| 199 | .               | .                 | ,00            | ,00                        |
| 200 | .               | .                 | ,00            | ,00                        |
| 201 | .               | .                 | ,00            | ,00                        |
| 202 | .               | .                 | ,00            | ,00                        |
| 203 | .               | .                 | ,00            | ,00                        |
| 204 | .               | .                 | ,00            | ,00                        |
| 205 | .               | .                 | ,00            | ,00                        |
| 206 | .               | .                 | ,00            | ,00                        |
| 207 | .               | .                 | ,00            | ,00                        |
| 208 | .               | .                 | ,00            | ,00                        |
| 209 | .               | .                 | ,00            | ,00                        |
| 210 | .               | .                 | ,00            | ,00                        |
| 211 | .               | .                 | ,00            | ,00                        |
| 212 | .               | .                 | ,00            | ,00                        |
| 213 | ,00             | ,00               | ,00            | ,00                        |
| 214 | .               | .                 | ,00            | ,00                        |
| 215 | .               | .                 | ,00            | ,00                        |
| 216 | .               | .                 | ,00            | ,00                        |
| 217 | .               | .                 | ,00            | ,00                        |
| 218 | .               | .                 | ,00            | ,00                        |
| 219 | .               | .                 | ,00            | ,00                        |
| 220 | .               | .                 | ,00            | ,00                        |
| 221 | .               | .                 | ,00            | ,00                        |
| 222 | .               | .                 | ,00            | ,00                        |

## RCC for Publication.sav

|     | CD3medianbis2k5unddarüber |
|-----|---------------------------|
| 186 | 1,00                      |
| 187 | ,00                       |
| 188 | ,00                       |
| 189 | 1,00                      |
| 190 | 1,00                      |
| 191 | ,00                       |
| 192 | ,00                       |
| 193 | 1,00                      |
| 194 | ,00                       |
| 195 | ,00                       |
| 196 | 1,00                      |
| 197 | 1,00                      |
| 198 | ,00                       |
| 199 | 1,00                      |
| 200 | 1,00                      |
| 201 | ,00                       |
| 202 | ,00                       |
| 203 | 1,00                      |
| 204 | ,00                       |
| 205 | 1,00                      |
| 206 | ,00                       |
| 207 | ,00                       |
| 208 | ,00                       |
| 209 | ,00                       |
| 210 | 1,00                      |
| 211 | ,00                       |
| 212 | 1,00                      |
| 213 | 1,00                      |
| 214 | 1,00                      |
| 215 | ,00                       |
| 216 | ,00                       |
| 217 | ,00                       |
| 218 | 1,00                      |
| 219 | ,00                       |
| 220 | ,00                       |
| 221 | ,00                       |
| 222 | 1,00                      |

## RCC for Publication.sav

|     | Diagnosedatum_<br>Primär | Met_EarliestDatum | Last_contact_<br>Datum | AgeAtDiagnosis | Diagnosis_to<br>_lastcontact |
|-----|--------------------------|-------------------|------------------------|----------------|------------------------------|
| 223 | 03.11.2008               | 03.11.2008        | 15.03.2009             | 84             | 4                            |
| 224 | 15.11.2008               | .                 | 01.07.2012             | 39             | 43                           |
| 225 | 18.12.2008               | .                 | 25.10.2009             | 72             | 10                           |
| 226 | 15.02.2009               | .                 | 01.06.2012             | 47             | 39                           |
| 227 | 16.02.2009               | 05.09.2011        | 14.11.2011             | 59             | 32                           |
| 228 | 18.03.2009               | .                 | 09.02.2012             | 56             | 34                           |
| 229 | 20.03.2009               | .                 | 01.08.2012             | 71             | 40                           |
| 230 | 21.04.2009               | .                 | 01.02.2012             | 39             | 33                           |
| 231 | 29.04.2009               | 29.12.2009        | 01.07.2012             | 74             | 38                           |
| 232 | 02.05.2009               | .                 | 21.05.2012             | 73             | 36                           |
| 233 | 20.05.2009               | .                 | 23.05.2012             | 76             | 36                           |
| 234 | 22.06.2009               | .                 | 21.05.2012             | 60             | 34                           |
| 235 | 02.07.2009               | .                 | 21.05.2012             | 55             | 34                           |
| 236 | 15.07.2009               | 29.08.2010        | 29.08.2010             | 85             | 13                           |
| 237 | 22.07.2009               | .                 | 01.08.2012             | 69             | 36                           |
| 238 | 01.08.2009               | .                 | 01.07.2012             | 66             | 35                           |
| 239 | 06.10.2009               | .                 | 01.08.2012             | 79             | 33                           |
| 240 | 15.10.2009               | .                 | 01.07.2012             | 75             | 32                           |
| 241 | 02.11.2009               | .                 | 21.05.2012             | 55             | 30                           |
| 242 | 02.11.2009               | 26.04.2011        | 01.07.2012             | 68             | 31                           |
| 243 | 20.11.2009               | .                 | 01.08.2012             | 68             | 32                           |
| 244 | 01.12.2009               | .                 | 01.07.2012             | 79             | 31                           |
| 245 | 07.12.2009               | 29.03.2012        | 01.06.2012             | 61             | 29                           |
| 246 | 15.12.2009               | .                 | 10.02.2012             | 77             | 25                           |
| 247 | 15.12.2009               | 15.12.2009        | 10.02.2012             | 81             | 25                           |
| 248 | 15.12.2009               | 15.12.2009        | 28.06.2012             | 52             | 30                           |
| 249 | 15.01.2010               | 15.01.2010        | 21.05.2012             | 70             | 28                           |
| 250 | 15.01.2010               | 15.01.2010        | 14.06.2012             | 54             | 28                           |
| 251 | 15.01.2010               | .                 | 01.06.2012             | 47             | 28                           |
| 252 | 08.02.2010               | .                 | 10.02.2012             | 77             | 24                           |
| 253 | 15.02.2010               | .                 | 16.05.2012             | 75             | 27                           |
| 254 | 15.02.2010               | .                 | 10.02.2012             | 47             | 23                           |
| 255 | 02.03.2010               | .                 | 17.06.2010             | 50             | 3                            |
| 256 | 02.03.2010               | .                 | 10.02.2012             | 50             | 23                           |
| 257 | 15.03.2010               | 21.06.2010        | 02.03.2012             | 57             | 23                           |
| 258 | 15.03.2010               | .                 | 10.02.2012             | 42             | 22                           |
| 259 | 15.03.2010               | .                 | 21.05.2012             | 73             | 26                           |

RCC for Publication.sav

|     | Survival_OS | Survival_DSS | Geschlecht | pT_grouped |
|-----|-------------|--------------|------------|------------|
| 223 | 1,00        | 1,00         | 2,00       | 3,00       |
| 224 | ,00         | ,00          | 2,00       | 1,00       |
| 225 | 1,00        | ,00          | 2,00       | 3,00       |
| 226 | ,00         | ,00          | 2,00       | 1,00       |
| 227 | 1,00        | ,00          | 1,00       | 1,00       |
| 228 | ,00         | ,00          | 2,00       | 3,00       |
| 229 | ,00         | ,00          | 2,00       | 1,00       |
| 230 | ,00         | ,00          | 2,00       | 1,00       |
| 231 | ,00         | ,00          | 1,00       | 1,00       |
| 232 | ,00         | ,00          | 1,00       | 1,00       |
| 233 | ,00         | ,00          | 2,00       | 1,00       |
| 234 | ,00         | ,00          | 2,00       | 1,00       |
| 235 | ,00         | ,00          | 1,00       | 1,00       |
| 236 | 1,00        | ,00          | 2,00       | 1,00       |
| 237 | ,00         | ,00          | 2,00       | 1,00       |
| 238 | ,00         | ,00          | 2,00       | 1,00       |
| 239 | ,00         | ,00          | 1,00       | 1,00       |
| 240 | ,00         | ,00          | 1,00       | 3,00       |
| 241 | ,00         | ,00          | 2,00       | 3,00       |
| 242 | ,00         | ,00          | 1,00       | 1,00       |
| 243 | ,00         | ,00          | 2,00       | 2,00       |
| 244 | ,00         | ,00          | 2,00       | 1,00       |
| 245 | ,00         | ,00          | 2,00       | 1,00       |
| 246 | ,00         | ,00          | 2,00       | 1,00       |
| 247 | ,00         | ,00          | 1,00       | 1,00       |
| 248 | ,00         | ,00          | 2,00       | 3,00       |
| 249 | ,00         | ,00          | 2,00       | 3,00       |
| 250 | ,00         | ,00          | 1,00       | 3,00       |
| 251 | ,00         | ,00          | 2,00       | 2,00       |
| 252 | ,00         | ,00          | 1,00       | 3,00       |
| 253 | ,00         | ,00          | 2,00       | 1,00       |
| 254 | ,00         | ,00          | 2,00       | 1,00       |
| 255 | ,00         | ,00          | 2,00       | 1,00       |
| 256 | ,00         | ,00          | 1,00       | 1,00       |
| 257 | ,00         | ,00          | 1,00       | 1,00       |
| 258 | ,00         | ,00          | 2,00       | 1,00       |
| 259 | ,00         | ,00          | 2,00       | 1,00       |

## RCC for Publication.sav

|     | Morphology_coded | Grading_Paktuell<br>April2013 | ECOG | Prop_PD1 |
|-----|------------------|-------------------------------|------|----------|
| 223 | 1,00             | 3                             | 1    | ,00      |
| 224 | 1,00             | 2                             | 0    | ,00      |
| 225 | 1,00             | 2                             | 1    | ,00      |
| 226 | 1,00             | 3                             | 0    | ,00      |
| 227 | 1,00             | 1                             | 0    | ,00      |
| 228 | 1,00             | 2                             | 0    | ,00      |
| 229 | 1,00             | 2                             | 0    | ,00      |
| 230 | 1,00             | 2                             | .    | ,00      |
| 231 | 1,00             | 1                             | 0    | ,00      |
| 232 | 1,00             | 2                             | 1    | ,00      |
| 233 | 1,00             | 2                             | 0    | ,00      |
| 234 | 1,00             | 2                             | 0    | ,00      |
| 235 | 1,00             | 2                             | 0    | ,00      |
| 236 | 1,00             | 2                             | 0    | ,00      |
| 237 | 1,00             | 2                             | 0    | ,00      |
| 238 | 1,00             | 2                             | 0    | ,00      |
| 239 | 1,00             | 1                             | 1    | ,00      |
| 240 | 1,00             | 3                             | .    | ,00      |
| 241 | 1,00             | 3                             | 2    | ,00      |
| 242 | 1,00             | 2                             | 0    | ,00      |
| 243 | 1,00             | 3                             | 0    | ,00      |
| 244 | 1,00             | 1                             | 1    | ,00      |
| 245 | 1,00             | 3                             | 0    | ,00      |
| 246 | 1,00             | 2                             | 0    | ,00      |
| 247 | 1,00             | 1                             | 0    | ,00      |
| 248 | 1,00             | 2                             | 0    | ,00      |
| 249 | 1,00             | 2                             | 1    | ,00      |
| 250 | 1,00             | 3                             | 0    | ,00      |
| 251 | 1,00             | 2                             | 0    | ,00      |
| 252 | 1,00             | 3                             | 1    | ,00      |
| 253 | 1,00             | 2                             | 1    | ,00      |
| 254 | 1,00             | 2                             | 1    | ,00      |
| 255 | 1,00             | 2                             | 0    | ,00      |
| 256 | 1,00             | 2                             | 0    | ,00      |
| 257 | 1,00             | 2                             | 0    | .        |
| 258 | 1,00             | 2                             | 0    | ,00      |
| 259 | 1,00             | 2                             | 0    | ,00      |

## RCC for Publication.sav

|     | Intens_PD1 | PD1IRS | Prop_PDL1_TU | Intens_PDL1_TU | PDL1_TU_IRS |
|-----|------------|--------|--------------|----------------|-------------|
| 223 | .          | ,00    | ,00          | .              | ,00         |
| 224 | .          | ,00    | ,00          | .              | ,00         |
| 225 | .          | ,00    | ,00          | .              | ,00         |
| 226 | .          | ,00    | ,00          | .              | ,00         |
| 227 | .          | ,00    | ,00          | .              | ,00         |
| 228 | .          | ,00    | ,00          | .              | ,00         |
| 229 | .          | ,00    | ,00          | .              | ,00         |
| 230 | .          | ,00    | ,00          | .              | ,00         |
| 231 | .          | ,00    | ,00          | .              | ,00         |
| 232 | .          | ,00    | ,00          | .              | ,00         |
| 233 | .          | ,00    | ,00          | .              | ,00         |
| 234 | .          | ,00    | ,00          | .              | ,00         |
| 235 | .          | ,00    | ,00          | .              | ,00         |
| 236 | .          | ,00    | ,00          | .              | ,00         |
| 237 | .          | ,00    | ,00          | .              | ,00         |
| 238 | .          | ,00    | ,00          | .              | ,00         |
| 239 | .          | ,00    | ,00          | .              | ,00         |
| 240 | .          | ,00    | ,00          | .              | ,00         |
| 241 | .          | ,00    | ,00          | .              | ,00         |
| 242 | .          | ,00    | ,00          | .              | ,00         |
| 243 | .          | ,00    | ,00          | .              | ,00         |
| 244 | .          | ,00    | ,00          | .              | ,00         |
| 245 | .          | ,00    | ,00          | .              | ,00         |
| 246 | .          | ,00    | ,00          | .              | ,00         |
| 247 | .          | ,00    | ,00          | .              | ,00         |
| 248 | .          | ,00    | ,00          | .              | ,00         |
| 249 | .          | ,00    | ,00          | .              | ,00         |
| 250 | .          | ,00    | ,00          | .              | ,00         |
| 251 | .          | ,00    | ,00          | .              | ,00         |
| 252 | .          | ,00    | ,00          | .              | ,00         |
| 253 | .          | ,00    | ,00          | .              | ,00         |
| 254 | .          | ,00    | ,00          | .              | ,00         |
| 255 | .          | ,00    | ,00          | .              | ,00         |
| 256 | .          | ,00    | ,00          | .              | ,00         |
| 257 | .          | .      | ,00          | ,00            | ,00         |
| 258 | .          | ,00    | ,00          | .              | ,00         |
| 259 | .          | ,00    | ,00          | .              | ,00         |



## RCC for Publication.sav

|     | Prop_PDL1_Lymph | Intens_PDL1_Lymph | PDL1_Lymph_IRS | andreasProp_Lymph_CTLA4_TU |
|-----|-----------------|-------------------|----------------|----------------------------|
| 223 | .               | .                 | ,00            | ,00                        |
| 224 | .               | .                 | ,00            | ,00                        |
| 225 | .               | .                 | ,00            | 1,00                       |
| 226 | .               | .                 | ,00            | ,00                        |
| 227 | .               | .                 | ,00            | ,00                        |
| 228 | .               | .                 | ,00            | ,00                        |
| 229 | .               | .                 | ,00            | ,00                        |
| 230 | .               | .                 | ,00            | 2,00                       |
| 231 | .               | .                 | ,00            | ,00                        |
| 232 | .               | .                 | ,00            | ,00                        |
| 233 | .               | .                 | ,00            | ,00                        |
| 234 | .               | .                 | ,00            | ,00                        |
| 235 | .               | .                 | ,00            | ,00                        |
| 236 | .               | .                 | ,00            | ,00                        |
| 237 | .               | .                 | ,00            | ,00                        |
| 238 | .               | .                 | ,00            | ,00                        |
| 239 | .               | .                 | ,00            | ,00                        |
| 240 | .               | .                 | ,00            | ,00                        |
| 241 | .               | .                 | ,00            | ,00                        |
| 242 | .               | .                 | ,00            | ,00                        |
| 243 | .               | .                 | ,00            | ,00                        |
| 244 | .               | .                 | ,00            | 2,00                       |
| 245 | .               | .                 | ,00            | ,00                        |
| 246 | .               | .                 | ,00            | ,00                        |
| 247 | .               | .                 | ,00            | ,00                        |
| 248 | .               | .                 | ,00            | 1,00                       |
| 249 | .               | .                 | ,00            | ,00                        |
| 250 | .               | .                 | ,00            | ,00                        |
| 251 | .               | .                 | ,00            | ,00                        |
| 252 | .               | .                 | ,00            | ,00                        |
| 253 | .               | .                 | ,00            | ,00                        |
| 254 | .               | .                 | ,00            | ,00                        |
| 255 | .               | .                 | ,00            | ,00                        |
| 256 | .               | .                 | ,00            | ,00                        |
| 257 | ,00             | ,00               | ,00            | ,00                        |
| 258 | .               | .                 | ,00            | ,00                        |
| 259 | .               | .                 | ,00            | ,00                        |

## RCC for Publication.sav

|     | CD3medianbis2k5unddarüber |
|-----|---------------------------|
| 223 | 1,00                      |
| 224 | ,00                       |
| 225 | 1,00                      |
| 226 | 1,00                      |
| 227 | ,00                       |
| 228 | ,00                       |
| 229 | 1,00                      |
| 230 | 1,00                      |
| 231 | 1,00                      |
| 232 | 1,00                      |
| 233 | 1,00                      |
| 234 | ,00                       |
| 235 | 1,00                      |
| 236 | 1,00                      |
| 237 | 1,00                      |
| 238 | 1,00                      |
| 239 | ,00                       |
| 240 | 1,00                      |
| 241 | 1,00                      |
| 242 | ,00                       |
| 243 | 1,00                      |
| 244 | ,00                       |
| 245 | 1,00                      |
| 246 | 1,00                      |
| 247 | ,00                       |
| 248 | ,00                       |
| 249 | 1,00                      |
| 250 | 1,00                      |
| 251 | .                         |
| 252 | 1,00                      |
| 253 | 1,00                      |
| 254 | 1,00                      |
| 255 | 1,00                      |
| 256 | ,00                       |
| 257 | ,00                       |
| 258 | ,00                       |
| 259 | ,00                       |

## RCC for Publication.sav

|     | Diagnosedatum_<br>Primär | Met_EarliestDatum | Last_contact_<br>Datum | AgeAtDiagnosis | Diagnosis_to<br>_lastcontact |
|-----|--------------------------|-------------------|------------------------|----------------|------------------------------|
| 260 | 31.03.2010               | .                 | 18.06.2012             | 23             | 26                           |
| 261 | 15.04.2010               | .                 | 21.05.2012             | 62             | 25                           |
| 262 | 02.05.2010               | .                 | 01.07.2012             | 59             | 25                           |
| 263 | 15.05.2010               | 15.05.2010        | 08.06.2012             | 71             | 24                           |
| 264 | 25.05.2010               | .                 | 03.04.2012             | 61             | 22                           |
| 265 | 07.06.2010               | .                 | 29.05.2012             | 53             | 23                           |
| 266 | 15.06.2010               | .                 | 03.04.2012             | 69             | 21                           |
| 267 | 15.06.2010               | .                 | 21.05.2012             | 82             | 23                           |
| 268 | 06.07.2010               | .                 | 11.07.2012             | 56             | 24                           |
| 269 | 06.07.2010               | .                 | 01.07.2012             | 68             | 23                           |
| 270 | 26.07.2010               | .                 | 02.04.2012             | 49             | 20                           |
| 271 | 16.08.2010               | .                 | 01.06.2012             | 68             | 21                           |
| 272 | 15.09.2010               | .                 | 21.05.2012             | 49             | 20                           |
| 273 | 04.10.2010               | .                 | 23.05.2012             | 60             | 19                           |
| 274 | 10.01.2011               | .                 | 26.03.2012             | 53             | 14                           |
| 275 | 18.01.2011               | .                 | 21.05.2012             | 61             | 16                           |
| 276 | 03.03.2011               | .                 | 27.03.2012             | 66             | 12                           |
| 277 | 14.03.2011               | .                 | 24.02.2012             | 53             | 11                           |
| 278 | 15.03.2011               | .                 | 01.07.2012             | 69             | 15                           |
| 279 | 05.04.2011               | .                 | 15.03.2012             | 70             | 11                           |
| 280 | 11.04.2011               | .                 | 01.08.2012             | 65             | 15                           |
| 281 | 15.04.2011               | .                 | 01.07.2012             | 41             | 14                           |
| 282 | 19.05.2011               | .                 | 23.05.2012             | 69             | 12                           |
| 283 | 22.06.2011               | .                 | 11.06.2012             | 59             | 11                           |
| 284 | 11.07.2011               | .                 | 01.03.2012             | 68             | 7                            |
| 285 | 12.07.2011               | .                 | 23.03.2012             | 32             | 8                            |
| 286 | 21.09.2011               | .                 | 24.05.2012             | 63             | 8                            |
| 287 | 21.09.2011               | .                 | 19.07.2012             | 69             | 9                            |
| 288 | 27.09.2011               | .                 | 01.07.2012             | 62             | 9                            |
| 289 | 08.11.2011               | .                 | 25.03.2012             | 74             | 4                            |
| 290 | 17.09.1998               | .                 | 07.02.2012             | 77             | 160                          |
| 291 | 08.03.2005               | 08.03.2005        | 05.06.2005             | 68             | 2                            |
| 292 | 04.12.2009               | 04.12.2009        | 14.06.2012             | 70             | 30                           |
| 293 | 15.07.2010               | .                 | 01.06.2012             | 65             | 22                           |
| 294 | 17.02.2005               | .                 | 18.05.2012             | 76             | 87                           |
| 295 | 24.10.2011               | .                 | 01.07.2012             | 53             | 8                            |
| 296 | 10.01.2002               | .                 | 01.11.2011             | 60             | 117                          |

RCC for Publication.sav

|     | Survival_OS | Survival_DSS | Geschlecht | pT_grouped |
|-----|-------------|--------------|------------|------------|
| 260 | ,00         | ,00          | 2,00       | 1,00       |
| 261 | ,00         | ,00          | 2,00       | 1,00       |
| 262 | ,00         | ,00          | 2,00       | 1,00       |
| 263 | ,00         | ,00          | 1,00       | 1,00       |
| 264 | ,00         | ,00          | 2,00       | 1,00       |
| 265 | ,00         | ,00          | 2,00       | .          |
| 266 | ,00         | ,00          | 1,00       | 1,00       |
| 267 | ,00         | ,00          | 2,00       | 3,00       |
| 268 | ,00         | ,00          | 1,00       | 3,00       |
| 269 | ,00         | ,00          | 2,00       | 1,00       |
| 270 | ,00         | ,00          | 2,00       | 1,00       |
| 271 | ,00         | ,00          | 2,00       | 1,00       |
| 272 | ,00         | ,00          | 2,00       | 1,00       |
| 273 | ,00         | ,00          | 1,00       | 1,00       |
| 274 | ,00         | ,00          | 2,00       | 1,00       |
| 275 | ,00         | ,00          | 1,00       | 1,00       |
| 276 | ,00         | ,00          | 2,00       | 1,00       |
| 277 | ,00         | ,00          | 1,00       | 1,00       |
| 278 | ,00         | ,00          | 2,00       | 1,00       |
| 279 | ,00         | ,00          | 2,00       | 1,00       |
| 280 | ,00         | ,00          | 2,00       | 1,00       |
| 281 | ,00         | ,00          | 2,00       | 2,00       |
| 282 | ,00         | ,00          | 2,00       | 1,00       |
| 283 | ,00         | ,00          | 2,00       | 1,00       |
| 284 | ,00         | ,00          | 2,00       | 2,00       |
| 285 | ,00         | ,00          | 1,00       | 1,00       |
| 286 | ,00         | ,00          | 1,00       | 3,00       |
| 287 | ,00         | ,00          | 2,00       | 2,00       |
| 288 | ,00         | ,00          | 1,00       | 1,00       |
| 289 | ,00         | ,00          | 1,00       | 1,00       |
| 290 | ,00         | ,00          | 2,00       | 1,00       |
| 291 | 1,00        | ,00          | 2,00       | 3,00       |
| 292 | ,00         | ,00          | 2,00       | 1,00       |
| 293 | ,00         | ,00          | 2,00       | 1,00       |
| 294 | ,00         | ,00          | 1,00       | 1,00       |
| 295 | ,00         | ,00          | 2,00       | 1,00       |
| 296 | 1,00        | ,00          | 2,00       | 1,00       |

## RCC for Publication.sav

|     | Morphology_coded | Grading_Paktuell<br>April2013 | ECOG | Prop_PD1 |
|-----|------------------|-------------------------------|------|----------|
| 260 | 1,00             | 1                             | 0    | ,00      |
| 261 | 1,00             | 3                             | 0    | ,00      |
| 262 | 1,00             | 1                             | 1    | ,00      |
| 263 | 1,00             | 2                             | 0    | ,00      |
| 264 | 1,00             | 2                             | 0    | ,00      |
| 265 | 1,00             | 1                             | .    | ,00      |
| 266 | 1,00             | 2                             | 0    | ,00      |
| 267 | 1,00             | 2                             | 0    | ,00      |
| 268 | 1,00             | 2                             | 0    | ,00      |
| 269 | 1,00             | 2                             | 1    | ,00      |
| 270 | 1,00             | 2                             | 0    | ,00      |
| 271 | 1,00             | 2                             | 0    | ,00      |
| 272 | 1,00             | 2                             | .    | ,00      |
| 273 | 1,00             | 2                             | 0    | ,00      |
| 274 | 1,00             | 1                             | 0    | ,00      |
| 275 | 1,00             | 1                             | 0    | ,00      |
| 276 | 1,00             | 2                             | 0    | ,00      |
| 277 | 1,00             | 2                             | 0    | ,00      |
| 278 | 1,00             | 2                             | 0    | ,00      |
| 279 | 1,00             | 2                             | 0    | ,00      |
| 280 | 1,00             | 1                             | .    | ,00      |
| 281 | 1,00             | 2                             | 0    | ,00      |
| 282 | 1,00             | 2                             | .    | ,00      |
| 283 | 1,00             | 2                             | 0    | ,00      |
| 284 | 1,00             | 1                             | .    | ,00      |
| 285 | 1,00             | 1                             | 0    | ,00      |
| 286 | 1,00             | 2                             | 0    | ,00      |
| 287 | 1,00             | 2                             | 1    | ,00      |
| 288 | 1,00             | 2                             | .    | ,00      |
| 289 | 1,00             | 2                             | .    | ,00      |
| 290 | 1,00             | 2                             | .    | ,00      |
| 291 | 1,00             | 3                             | 0    | ,00      |
| 292 | 1,00             | 2                             | 1    | ,00      |
| 293 | 1,00             | 2                             | 0    | ,00      |
| 294 | 1,00             | 3                             | 0    | ,00      |
| 295 | 1,00             | 2                             | 0    | ,00      |
| 296 | 1,00             | 2                             | .    | ,00      |

RCC for Publication.sav

|     | Intens_PD1 | PD1IRS | Prop_PDL1_TU | Intens_PDL1_TU | PDL1_TU_IRS |
|-----|------------|--------|--------------|----------------|-------------|
| 260 | .          | ,00    | ,00          | .              | ,00         |
| 261 | .          | ,00    | ,00          | .              | ,00         |
| 262 | .          | ,00    | ,00          | .              | ,00         |
| 263 | .          | ,00    | ,00          | .              | ,00         |
| 264 | .          | ,00    | ,00          | .              | ,00         |
| 265 | .          | ,00    | ,00          | .              | ,00         |
| 266 | .          | ,00    | ,00          | .              | ,00         |
| 267 | .          | ,00    | ,00          | .              | ,00         |
| 268 | .          | ,00    | ,00          | .              | ,00         |
| 269 | .          | ,00    | ,00          | .              | ,00         |
| 270 | .          | ,00    | ,00          | .              | ,00         |
| 271 | .          | ,00    | ,00          | .              | ,00         |
| 272 | .          | ,00    | ,00          | .              | ,00         |
| 273 | .          | ,00    | ,00          | .              | ,00         |
| 274 | .          | ,00    | ,00          | .              | ,00         |
| 275 | .          | ,00    | ,00          | .              | ,00         |
| 276 | .          | ,00    | ,00          | .              | ,00         |
| 277 | .          | ,00    | ,00          | .              | ,00         |
| 278 | .          | ,00    | ,00          | .              | ,00         |
| 279 | .          | ,00    | ,00          | .              | ,00         |
| 280 | .          | ,00    | ,00          | .              | ,00         |
| 281 | .          | ,00    | ,00          | .              | ,00         |
| 282 | .          | ,00    | ,00          | .              | ,00         |
| 283 | .          | ,00    | ,00          | .              | ,00         |
| 284 | .          | ,00    | ,00          | .              | ,00         |
| 285 | .          | ,00    | ,00          | .              | ,00         |
| 286 | .          | ,00    | ,00          | .              | ,00         |
| 287 | .          | ,00    | ,00          | .              | ,00         |
| 288 | .          | ,00    | ,00          | .              | ,00         |
| 289 | .          | ,00    | ,00          | .              | ,00         |
| 290 | .          | ,00    | ,00          | .              | ,00         |
| 291 | .          | ,00    | ,00          | .              | ,00         |
| 292 | .          | ,00    | ,00          | .              | ,00         |
| 293 | .          | ,00    | ,00          | .              | ,00         |
| 294 | .          | ,00    | 2,00         | 1,00           | 2,00        |
| 295 | .          | ,00    | 2,00         | 1,00           | 2,00        |
| 296 | .          | ,00    | 2,00         | 3,00           | 2,00        |

## RCC for Publication.sav

|     | Prop_PDL1_Lymph | Intens_PDL1_Lymph | PDL1_Lymph_IRS | andreasProp_Lymph_CTLA4_TU |
|-----|-----------------|-------------------|----------------|----------------------------|
| 260 | .               | .                 | ,00            | ,00                        |
| 261 | .               | .                 | ,00            | ,00                        |
| 262 | .               | .                 | ,00            | ,00                        |
| 263 | .               | .                 | ,00            | ,00                        |
| 264 | .               | .                 | ,00            | ,00                        |
| 265 | .               | .                 | ,00            | ,00                        |
| 266 | .               | .                 | ,00            | ,00                        |
| 267 | .               | .                 | ,00            | ,00                        |
| 268 | .               | .                 | ,00            | ,00                        |
| 269 | .               | .                 | ,00            | ,00                        |
| 270 | .               | .                 | ,00            | ,00                        |
| 271 | .               | .                 | ,00            | ,00                        |
| 272 | .               | .                 | ,00            | ,00                        |
| 273 | .               | .                 | ,00            | ,00                        |
| 274 | .               | .                 | ,00            | ,00                        |
| 275 | .               | .                 | ,00            | ,00                        |
| 276 | .               | .                 | ,00            | ,00                        |
| 277 | .               | .                 | ,00            | ,00                        |
| 278 | .               | .                 | ,00            | ,00                        |
| 279 | .               | .                 | ,00            | ,00                        |
| 280 | .               | .                 | ,00            | ,00                        |
| 281 | .               | .                 | ,00            | ,00                        |
| 282 | .               | .                 | ,00            | ,00                        |
| 283 | .               | .                 | ,00            | ,00                        |
| 284 | .               | .                 | ,00            | ,00                        |
| 285 | .               | .                 | ,00            | ,00                        |
| 286 | .               | .                 | ,00            | ,00                        |
| 287 | .               | .                 | ,00            | ,00                        |
| 288 | .               | .                 | ,00            | ,00                        |
| 289 | .               | .                 | ,00            | ,00                        |
| 290 | .               | .                 | ,00            | 10,00                      |
| 291 | .               | .                 | ,00            | 5,00                       |
| 292 | .               | .                 | ,00            | 10,00                      |
| 293 | .               | .                 | ,00            | 10,00                      |
| 294 | .               | .                 | ,00            | .                          |
| 295 | .               | .                 | ,00            | .                          |
| 296 | .               | .                 | ,00            | ,00                        |

## RCC for Publication.sav

|     | CD3medianbis2k5unddarüber |
|-----|---------------------------|
| 260 | ,00                       |
| 261 | 1,00                      |
| 262 | 1,00                      |
| 263 | ,00                       |
| 264 | ,00                       |
| 265 | ,00                       |
| 266 | ,00                       |
| 267 | 1,00                      |
| 268 | 1,00                      |
| 269 | ,00                       |
| 270 | ,00                       |
| 271 | 1,00                      |
| 272 | ,00                       |
| 273 | 1,00                      |
| 274 | ,00                       |
| 275 | 1,00                      |
| 276 | ,00                       |
| 277 | ,00                       |
| 278 | 1,00                      |
| 279 | 1,00                      |
| 280 | ,00                       |
| 281 | .                         |
| 282 | 1,00                      |
| 283 | 1,00                      |
| 284 | ,00                       |
| 285 | ,00                       |
| 286 | 1,00                      |
| 287 | ,00                       |
| 288 | 1,00                      |
| 289 | ,00                       |
| 290 | ,00                       |
| 291 | 1,00                      |
| 292 | 1,00                      |
| 293 | 1,00                      |
| 294 | 1,00                      |
| 295 | .                         |
| 296 | ,00                       |



## RCC for Publication.sav

|     | Diagnosedatum_<br>Primär | Met_EarliestDatum | Last_contact_<br>Datum | AgeAtDiagnosis | Diagnosis_to<br>_lastcontact |
|-----|--------------------------|-------------------|------------------------|----------------|------------------------------|
| 297 | 22.12.2003               | .                 | 01.07.2012             | 64             | 102                          |
| 298 | 25.05.2004               | .                 | 22.03.2010             | 61             | 69                           |
| 299 | 28.07.2004               | .                 | 11.08.2006             | 67             | 24                           |
| 300 | 29.04.2005               | .                 | 01.08.2012             | 28             | 87                           |
| 301 | 02.08.2005               | 02.08.2005        | 21.04.2011             | 77             | 68                           |
| 302 | 25.01.2006               | .                 | 01.07.2012             | 67             | 77                           |
| 303 | 31.03.2006               | .                 | 01.08.2012             | 60             | 76                           |
| 304 | 11.05.2006               | .                 | 01.07.2012             | 54             | 73                           |
| 305 | 15.03.2007               | 15.03.2007        | 15.06.2008             | 72             | 15                           |
| 306 | 08.05.2008               | .                 | 01.06.2012             | 83             | 48                           |
| 307 | 11.06.2010               | .                 | 11.04.2012             | 51             | 22                           |
| 308 | 06.03.2008               | 16.07.2008        | 18.07.2008             | 66             | 4                            |
| 309 | 19.07.2011               | .                 | 01.08.2012             | 63             | 12                           |
| 310 | 02.07.2007               | .                 | 19.03.2012             | 60             | 56                           |
| 311 | 16.03.1999               | 29.03.2010        | 01.07.2012             | 50             | 159                          |
| 312 | 15.04.2006               | .                 | 01.07.2012             | 67             | 74                           |
| 313 | 24.04.2007               | .                 | 16.05.2012             | 61             | 60                           |
| 314 | 09.06.2008               | .                 | 01.07.2012             | 68             | 48                           |
| 315 | 10.09.2008               | .                 | 02.01.2009             | 72             | 3                            |
| 316 | 08.10.2009               | .                 | 10.02.2012             | 67             | 28                           |
| 317 | 09.06.2006               | .                 | 01.07.2012             | 46             | 72                           |
| 318 | 29.07.2009               | 15.02.2011        | 19.05.2011             | 84             | 21                           |
| 319 | 15.10.2009               | .                 | 10.02.2012             | 77             | 27                           |
| 320 | 15.04.2010               | .                 | 21.05.2012             | 69             | 25                           |
| 321 | 06.09.2005               | .                 | 01.07.2012             | 44             | 81                           |
| 322 | 29.09.2005               | 29.09.2005        | 13.07.2006             | 52             | 9                            |
| 323 | 18.02.2009               | .                 | 01.07.2012             | 57             | 40                           |
| 324 | 24.03.2009               | 02.10.2009        | 13.08.2010             | 72             | 16                           |
| 325 | 03.07.2009               | 20.07.2010        | 22.05.2012             | 54             | 34                           |
| 326 | 02.09.2009               | 02.09.2009        | 21.05.2012             | 59             | 32                           |
| 327 | 01.07.2010               | 01.07.2010        | 19.09.2010             | 76             | 2                            |
| 328 | 30.08.2010               | .                 | 21.05.2012             | 61             | 20                           |
| 329 | 01.10.2010               | .                 | 21.05.2012             | 56             | 19                           |
| 330 | 15.01.2011               | 15.05.2011        | 01.06.2012             | 60             | 16                           |
| 331 | 19.04.2003               | 29.07.2003        | 13.08.2003             | 76             | 3                            |
| 332 | 02.08.2007               | 02.08.2007        | 14.06.2012             | 73             | 58                           |
| 333 | 25.05.2009               | 25.05.2009        | 24.08.2011             | 74             | 26                           |

RCC for Publication.sav

|     | Survival_OS | Survival_DSS | Geschlecht | pT_grouped |
|-----|-------------|--------------|------------|------------|
| 297 | ,00         | ,00          | 2,00       | 1,00       |
| 298 | 1,00        | ,00          | 2,00       | 3,00       |
| 299 | 1,00        | ,00          | 1,00       | 1,00       |
| 300 | ,00         | ,00          | 2,00       | 3,00       |
| 301 | 1,00        | ,00          | 2,00       | 3,00       |
| 302 | ,00         | ,00          | 2,00       | 3,00       |
| 303 | ,00         | ,00          | 2,00       | 1,00       |
| 304 | ,00         | ,00          | 2,00       | 1,00       |
| 305 | 1,00        | 1,00         | 1,00       | 3,00       |
| 306 | ,00         | ,00          | 1,00       | 3,00       |
| 307 | ,00         | ,00          | 2,00       | 1,00       |
| 308 | 1,00        | 1,00         | 2,00       | 3,00       |
| 309 | ,00         | ,00          | 2,00       | 1,00       |
| 310 | ,00         | ,00          | 1,00       | 1,00       |
| 311 | ,00         | ,00          | 1,00       | 3,00       |
| 312 | ,00         | ,00          | 1,00       | 1,00       |
| 313 | ,00         | ,00          | 1,00       | 1,00       |
| 314 | ,00         | ,00          | 1,00       | 1,00       |
| 315 | 1,00        | ,00          | 2,00       | 3,00       |
| 316 | ,00         | ,00          | 1,00       | 1,00       |
| 317 | ,00         | ,00          | 2,00       | 1,00       |
| 318 | 1,00        | ,00          | 2,00       | 1,00       |
| 319 | 1,00        | ,00          | 2,00       | 3,00       |
| 320 | ,00         | ,00          | 1,00       | 1,00       |
| 321 | ,00         | ,00          | 2,00       | 1,00       |
| 322 | 1,00        | 1,00         | 2,00       | 3,00       |
| 323 | ,00         | ,00          | 2,00       | 2,00       |
| 324 | 1,00        | ,00          | 2,00       | 1,00       |
| 325 | ,00         | ,00          | 2,00       | 3,00       |
| 326 | ,00         | ,00          | 2,00       | 3,00       |
| 327 | 1,00        | ,00          | 2,00       | 3,00       |
| 328 | ,00         | ,00          | 2,00       | 2,00       |
| 329 | ,00         | ,00          | 1,00       | 1,00       |
| 330 | ,00         | ,00          | 2,00       | 2,00       |
| 331 | 1,00        | 1,00         | 1,00       | 3,00       |
| 332 | ,00         | ,00          | 1,00       | 4,00       |
| 333 | 1,00        | ,00          | 2,00       | 3,00       |

## RCC for Publication.sav

|     | Morphology_coded | Grading_Paktuell<br>April2013 | ECOG | Prop_PD1 |
|-----|------------------|-------------------------------|------|----------|
| 297 | 1,00             | 3                             | 0    | ,00      |
| 298 | 1,00             | 3                             | 0    | ,00      |
| 299 | 1,00             | 1                             | 0    | ,00      |
| 300 | 1,00             | 2                             | 0    | ,00      |
| 301 | 1,00             | 3                             | 1    | ,00      |
| 302 | 1,00             | 3                             | 0    | ,00      |
| 303 | 1,00             | 3                             | 0    | ,00      |
| 304 | 1,00             | 2                             | 0    | ,00      |
| 305 | 1,00             | 3                             | 1    | ,00      |
| 306 | 1,00             | 2                             | 1    | ,00      |
| 307 | 1,00             | 2                             | 1    | ,00      |
| 308 | 1,00             | 3                             | 0    | ,00      |
| 309 | 1,00             | 2                             | 0    | ,00      |
| 310 | 1,00             | 3                             | .    | ,00      |
| 311 | 1,00             | 2                             | 0    | ,00      |
| 312 | 1,00             | 2                             | 1    | ,00      |
| 313 | 1,00             | 3                             | 0    | ,00      |
| 314 | 1,00             | 2                             | 0    | ,00      |
| 315 | 1,00             | 2                             | 0    | ,00      |
| 316 | 1,00             | 1                             | 0    | ,00      |
| 317 | 1,00             | 2                             | 0    | ,00      |
| 318 | 1,00             | 3                             | .    | ,00      |
| 319 | 1,00             | 3                             | 0    | 1,00     |
| 320 | 1,00             | 2                             | 1    | 1,00     |
| 321 | 1,00             | 2                             | 1    | 1,00     |
| 322 | 1,00             | 3                             | 0    | 1,00     |
| 323 | 1,00             | 3                             | 0    | 1,00     |
| 324 | 1,00             | 3                             | 2    | 1,00     |
| 325 | 1,00             | 3                             | 0    | 1,00     |
| 326 | 1,00             | 2                             | 0    | 1,00     |
| 327 | 1,00             | 3                             | 2    | 2,00     |
| 328 | 1,00             | 2                             | 0    | 1,00     |
| 329 | 1,00             | 2                             | 0    | 1,00     |
| 330 | 1,00             | 3                             | .    | 1,00     |
| 331 | 1,00             | 3                             | .    | 1,00     |
| 332 | 1,00             | 2                             | .    | 1,00     |
| 333 | 1,00             | 2                             | 1    | 1,00     |

RCC for Publication.sav

|     | Intens_PD1 | PD1IRS | Prop_PDL1_TU | Intens_PDL1_TU | PDL1_TU_IRS |
|-----|------------|--------|--------------|----------------|-------------|
| 297 | .          | ,00    | 2,00         | 1,00           | 2,00        |
| 298 | .          | ,00    | 1,00         | 2,00           | 1,00        |
| 299 | .          | ,00    | 3,00         | 1,00           | 3,00        |
| 300 | .          | ,00    | 1,00         | 2,00           | 2,00        |
| 301 | .          | ,00    | 2,00         | 1,00           | 2,00        |
| 302 | .          | ,00    | 1,00         | 1,00           | 1,00        |
| 303 | .          | ,00    | 1,00         | 1,00           | 1,00        |
| 304 | .          | ,00    | 1,00         | 1,00           | 1,00        |
| 305 | .          | ,00    | 2,00         | 1,00           | 2,00        |
| 306 | .          | ,00    | 2,00         | 3,00           | 6,00        |
| 307 | .          | ,00    | 1,00         | 1,00           | 1,00        |
| 308 | .          | ,00    | 2,00         | 1,00           | 2,00        |
| 309 | .          | ,00    | 2,00         | 1,00           | 2,00        |
| 310 | .          | ,00    | ,00          | .              | ,00         |
| 311 | .          | ,00    | ,00          | .              | ,00         |
| 312 | .          | ,00    | ,00          | .              | ,00         |
| 313 | .          | ,00    | ,00          | .              | ,00         |
| 314 | .          | ,00    | ,00          | .              | ,00         |
| 315 | .          | ,00    | ,00          | .              | ,00         |
| 316 | .          | ,00    | ,00          | .              | ,00         |
| 317 | .          | ,00    | 2,00         | 2,00           | 4,00        |
| 318 | ,00        | ,00    | ,00          | ,00            | ,00         |
| 319 | 1,00       | 1,00   | ,00          | .              | ,00         |
| 320 | 2,00       | 2,00   | ,00          | .              | ,00         |
| 321 | 1,00       | 1,00   | ,00          | .              | ,00         |
| 322 | 1,00       | 1,00   | ,00          | .              | ,00         |
| 323 | 1,00       | 1,00   | ,00          | .              | ,00         |
| 324 | 1,00       | 1,00   | ,00          | .              | ,00         |
| 325 | 1,00       | 1,00   | ,00          | .              | ,00         |
| 326 | 1,00       | 1,00   | ,00          | .              | ,00         |
| 327 | 3,00       | 6,00   | ,00          | .              | ,00         |
| 328 | 1,00       | 1,00   | ,00          | .              | ,00         |
| 329 | 1,00       | 1,00   | ,00          | .              | ,00         |
| 330 | 1,00       | 1,00   | ,00          | .              | ,00         |
| 331 | 1,00       | 1,00   | ,00          | .              | ,00         |
| 332 | 1,00       | 1,00   | ,00          | .              | ,00         |
| 333 | 1,00       | 1,00   | ,00          | .              | ,00         |

## RCC for Publication.sav

|     | Prop_PDL1_Lymph | Intens_PDL1_Lymph | PDL1_Lymph_IRS | andreasProp_Lymph_CTLA4_TU |
|-----|-----------------|-------------------|----------------|----------------------------|
| 297 | .               | .                 | ,00            | 2,00                       |
| 298 | .               | .                 | ,00            | 1,00                       |
| 299 | .               | .                 | ,00            | ,00                        |
| 300 | .               | .                 | ,00            | ,00                        |
| 301 | .               | .                 | ,00            | ,00                        |
| 302 | .               | .                 | ,00            | ,00                        |
| 303 | .               | .                 | ,00            | ,00                        |
| 304 | .               | .                 | ,00            | ,00                        |
| 305 | .               | .                 | ,00            | ,00                        |
| 306 | .               | .                 | ,00            | ,00                        |
| 307 | .               | .                 | ,00            | ,00                        |
| 308 | .               | .                 | ,00            | 10,00                      |
| 309 | .               | .                 | ,00            | 5,00                       |
| 310 | 2,00            | 1,00              | 2,00           | .                          |
| 311 | 2,00            | 2,00              | 4,00           | 1,00                       |
| 312 | 1,00            | 1,00              | 1,00           | 1,00                       |
| 313 | 1,00            | 1,00              | 1,00           | 1,00                       |
| 314 | 2,00            | 1,00              | 2,00           | ,00                        |
| 315 | 1,00            | 1,00              | 1,00           | ,00                        |
| 316 | 1,00            | 2,00              | 2,00           | ,00                        |
| 317 | 1,00            | 1,00              | 1,00           | 10,00                      |
| 318 | ,00             | ,00               | ,00            | .                          |
| 319 | .               | .                 | ,00            | .                          |
| 320 | .               | .                 | ,00            | .                          |
| 321 | .               | .                 | ,00            | 1,00                       |
| 322 | .               | .                 | ,00            | ,00                        |
| 323 | .               | .                 | ,00            | 2,00                       |
| 324 | .               | .                 | ,00            | ,00                        |
| 325 | .               | .                 | ,00            | ,00                        |
| 326 | .               | .                 | ,00            | ,00                        |
| 327 | .               | .                 | ,00            | ,00                        |
| 328 | .               | .                 | ,00            | ,00                        |
| 329 | .               | .                 | ,00            | ,00                        |
| 330 | .               | .                 | ,00            | ,00                        |
| 331 | .               | .                 | ,00            | 10,00                      |
| 332 | .               | .                 | ,00            | 5,00                       |
| 333 | .               | .                 | ,00            | 20,00                      |

## RCC for Publication.sav

|     | CD3medianbis2k5unddarüber |
|-----|---------------------------|
| 297 | ,00                       |
| 298 | ,00                       |
| 299 | ,00                       |
| 300 | 1,00                      |
| 301 | 1,00                      |
| 302 | 1,00                      |
| 303 | 1,00                      |
| 304 | ,00                       |
| 305 | ,00                       |
| 306 | 1,00                      |
| 307 | .                         |
| 308 | 1,00                      |
| 309 | 1,00                      |
| 310 | ,00                       |
| 311 | 1,00                      |
| 312 | 1,00                      |
| 313 | ,00                       |
| 314 | ,00                       |
| 315 | ,00                       |
| 316 | ,00                       |
| 317 | 1,00                      |
| 318 | 1,00                      |
| 319 | 1,00                      |
| 320 | 1,00                      |
| 321 | 1,00                      |
| 322 | 1,00                      |
| 323 | 1,00                      |
| 324 | 1,00                      |
| 325 | 1,00                      |
| 326 | 1,00                      |
| 327 | 1,00                      |
| 328 | 1,00                      |
| 329 | 1,00                      |
| 330 | 1,00                      |
| 331 | 1,00                      |
| 332 | 1,00                      |
| 333 | 1,00                      |

RCC for Publication.sav

|     | Diagnosedatum_<br>Primär | Met_EarliestDatum | Last_contact_<br>Datum | AgeAtDiagnosis | Diagnosis_to<br>_lastcontact |
|-----|--------------------------|-------------------|------------------------|----------------|------------------------------|
| 334 | 03.02.2010               | .                 | 05.03.2010             | 79             | 1                            |
| 335 | 11.03.2011               | .                 | 01.07.2012             | 40             | 15                           |
| 336 | 12.01.2004               | .                 | 01.07.2012             | 74             | 101                          |
| 337 | 14.07.2005               | .                 | 06.05.2011             | 73             | 69                           |
| 338 | 20.09.2011               | .                 | 04.04.2012             | 55             | 6                            |
| 339 | 09.05.2009               | 09.05.2009        | 06.08.2009             | 71             | 2                            |
| 340 | 15.02.2010               | .                 | 10.02.2012             | 78             | 23                           |
| 341 | 14.07.2011               | .                 | 05.04.2012             | 57             | 8                            |
| 342 | 03.03.2008               | .                 | 01.07.2012             | 70             | 51                           |
| 343 |                          |                   |                        |                |                              |
| 344 |                          |                   |                        |                |                              |
| 345 |                          |                   |                        |                |                              |
| 346 |                          |                   |                        |                |                              |
| 347 |                          |                   |                        |                |                              |
| 348 |                          |                   |                        |                |                              |
| 349 |                          |                   |                        |                |                              |
| 350 |                          |                   |                        |                |                              |
| 351 |                          |                   |                        |                |                              |
| 352 |                          |                   |                        |                |                              |
| 353 |                          |                   |                        |                |                              |
| 354 |                          |                   |                        |                |                              |
| 355 |                          |                   |                        |                |                              |
| 356 |                          |                   |                        |                |                              |
| 357 |                          |                   |                        |                |                              |
| 358 |                          |                   |                        |                |                              |
| 359 |                          |                   |                        |                |                              |
| 360 |                          |                   |                        |                |                              |
| 361 |                          |                   |                        |                |                              |
| 362 |                          |                   |                        |                |                              |
| 363 |                          |                   |                        |                |                              |
| 364 |                          |                   |                        |                |                              |
| 365 |                          |                   |                        |                |                              |
| 366 |                          |                   |                        |                |                              |
| 367 |                          |                   |                        |                |                              |
| 368 |                          |                   |                        |                |                              |
| 369 |                          |                   |                        |                |                              |
| 370 |                          |                   |                        |                |                              |

RCC for Publication.sav

|     | Survival_OS | Survival_DSS | Geschlecht | pT_grouped |
|-----|-------------|--------------|------------|------------|
| 334 | 1,00        | 1,00         | 2,00       | 3,00       |
| 335 | ,00         | ,00          | 2,00       | 1,00       |
| 336 | ,00         | ,00          | 2,00       | 1,00       |
| 337 | 1,00        | ,00          | 2,00       | 1,00       |
| 338 | ,00         | ,00          | 2,00       | 1,00       |
| 339 | 1,00        | 1,00         | 1,00       | 3,00       |
| 340 | ,00         | ,00          | 2,00       | 1,00       |
| 341 | ,00         | ,00          | 1,00       | 1,00       |
| 342 | ,00         | ,00          | 1,00       | 1,00       |
| 343 |             |              |            |            |
| 344 |             |              |            |            |
| 345 |             |              |            |            |
| 346 |             |              |            |            |
| 347 |             |              |            |            |
| 348 |             |              |            |            |
| 349 |             |              |            |            |
| 350 |             |              |            |            |
| 351 |             |              |            |            |
| 352 |             |              |            |            |
| 353 |             |              |            |            |
| 354 |             |              |            |            |
| 355 |             |              |            |            |
| 356 |             |              |            |            |
| 357 |             |              |            |            |
| 358 |             |              |            |            |
| 359 |             |              |            |            |
| 360 |             |              |            |            |
| 361 |             |              |            |            |
| 362 |             |              |            |            |
| 363 |             |              |            |            |
| 364 |             |              |            |            |
| 365 |             |              |            |            |
| 366 |             |              |            |            |
| 367 |             |              |            |            |
| 368 |             |              |            |            |
| 369 |             |              |            |            |
| 370 |             |              |            |            |



## RCC for Publication.sav

|     | Morphology_coded | Grading_Paktuell<br>April2013 | ECOG | Prop_PD1 |
|-----|------------------|-------------------------------|------|----------|
| 334 | 1,00             | 2                             | 1    | 1,00     |
| 335 | 1,00             | 2                             | 0    | 1,00     |
| 336 | 1,00             | 3                             | 0    | 2,00     |
| 337 | 1,00             | 2                             | 0    | 1,00     |
| 338 | 1,00             | 3                             | 0    | 1,00     |
| 339 | 1,00             | 3                             | 1    | 1,00     |
| 340 | 1,00             | 2                             | 0    | 1,00     |
| 341 | 1,00             | 1                             | 0    | ,00      |
| 342 | 1,00             | 2                             | 0    | 1,00     |
| 343 |                  |                               |      |          |
| 344 |                  |                               |      |          |
| 345 |                  |                               |      |          |
| 346 |                  |                               |      |          |
| 347 |                  |                               |      |          |
| 348 |                  |                               |      |          |
| 349 |                  |                               |      |          |
| 350 |                  |                               |      |          |
| 351 |                  |                               |      |          |
| 352 |                  |                               |      |          |
| 353 |                  |                               |      |          |
| 354 |                  |                               |      |          |
| 355 |                  |                               |      |          |
| 356 |                  |                               |      |          |
| 357 |                  |                               |      |          |
| 358 |                  |                               |      |          |
| 359 |                  |                               |      |          |
| 360 |                  |                               |      |          |
| 361 |                  |                               |      |          |
| 362 |                  |                               |      |          |
| 363 |                  |                               |      |          |
| 364 |                  |                               |      |          |
| 365 |                  |                               |      |          |
| 366 |                  |                               |      |          |
| 367 |                  |                               |      |          |
| 368 |                  |                               |      |          |
| 369 |                  |                               |      |          |
| 370 |                  |                               |      |          |

## RCC for Publication.sav

|     | Intens_PD1 | PD1IRS | Prop_PDL1_TU | Intens_PDL1_TU | PDL1_TU_IRS |
|-----|------------|--------|--------------|----------------|-------------|
| 334 | 1,00       | 1,00   | ,00          | .              | ,00         |
| 335 | 1,00       | 1,00   | 2,00         | 1,00           | 2,00        |
| 336 | 1,00       | 2,00   | 1,00         | 1,00           | 1,00        |
| 337 | 1,00       | 1,00   | 1,00         | 1,00           | 1,00        |
| 338 | 2,00       | 2,00   | 2,00         | 1,00           | 2,00        |
| 339 | 2,00       | 2,00   | 1,00         | 2,00           | 2,00        |
| 340 | 1,00       | 1,00   | 2,00         | 2,00           | 4,00        |
| 341 | .          | ,00    | 3,00         | 2,00           | 6,00        |
| 342 | 1,00       | 1,00   | ,00          | .              | ,00         |
| 343 |            |        |              |                |             |
| 344 |            |        |              |                |             |
| 345 |            |        |              |                |             |
| 346 |            |        |              |                |             |
| 347 |            |        |              |                |             |
| 348 |            |        |              |                |             |
| 349 |            |        |              |                |             |
| 350 |            |        |              |                |             |
| 351 |            |        |              |                |             |
| 352 |            |        |              |                |             |
| 353 |            |        |              |                |             |
| 354 |            |        |              |                |             |
| 355 |            |        |              |                |             |
| 356 |            |        |              |                |             |
| 357 |            |        |              |                |             |
| 358 |            |        |              |                |             |
| 359 |            |        |              |                |             |
| 360 |            |        |              |                |             |
| 361 |            |        |              |                |             |
| 362 |            |        |              |                |             |
| 363 |            |        |              |                |             |
| 364 |            |        |              |                |             |
| 365 |            |        |              |                |             |
| 366 |            |        |              |                |             |
| 367 |            |        |              |                |             |
| 368 |            |        |              |                |             |
| 369 |            |        |              |                |             |
| 370 |            |        |              |                |             |

## RCC for Publication.sav

|     | Prop_PDL1_Lymph | Intens_PDL1_Lymph | PDL1_Lymph_IRS | andreasProp_Lymph_CTLA4_TU |
|-----|-----------------|-------------------|----------------|----------------------------|
| 334 | .               | .                 | ,00            | 5,00                       |
| 335 | .               | .                 | ,00            | .                          |
| 336 | .               | .                 | ,00            | 1,00                       |
| 337 | .               | .                 | ,00            | ,00                        |
| 338 | .               | .                 | ,00            | ,00                        |
| 339 | .               | .                 | ,00            | 5,00                       |
| 340 | .               | .                 | ,00            | 10,00                      |
| 341 | .               | .                 | ,00            | 5,00                       |
| 342 | 2,00            | 2,00              | 4,00           | 2,00                       |
| 343 |                 |                   |                |                            |
| 344 |                 |                   |                |                            |
| 345 |                 |                   |                |                            |
| 346 |                 |                   |                |                            |
| 347 |                 |                   |                |                            |
| 348 |                 |                   |                |                            |
| 349 |                 |                   |                |                            |
| 350 |                 |                   |                |                            |
| 351 |                 |                   |                |                            |
| 352 |                 |                   |                |                            |
| 353 |                 |                   |                |                            |
| 354 |                 |                   |                |                            |
| 355 |                 |                   |                |                            |
| 356 |                 |                   |                |                            |
| 357 |                 |                   |                |                            |
| 358 |                 |                   |                |                            |
| 359 |                 |                   |                |                            |
| 360 |                 |                   |                |                            |
| 361 |                 |                   |                |                            |
| 362 |                 |                   |                |                            |
| 363 |                 |                   |                |                            |
| 364 |                 |                   |                |                            |
| 365 |                 |                   |                |                            |
| 366 |                 |                   |                |                            |
| 367 |                 |                   |                |                            |
| 368 |                 |                   |                |                            |
| 369 |                 |                   |                |                            |
| 370 |                 |                   |                |                            |

## RCC for Publication.sav

|     | CD3medianbis2k5unddarüber |
|-----|---------------------------|
| 334 | 1,00                      |
| 335 | 1,00                      |
| 336 | 1,00                      |
| 337 | 1,00                      |
| 338 | 1,00                      |
| 339 | 1,00                      |
| 340 | 1,00                      |
| 341 | 1,00                      |
| 342 | ,00                       |
| 343 |                           |
| 344 |                           |
| 345 |                           |
| 346 |                           |
| 347 |                           |
| 348 |                           |
| 349 |                           |
| 350 |                           |
| 351 |                           |
| 352 |                           |
| 353 |                           |
| 354 |                           |
| 355 |                           |
| 356 |                           |
| 357 |                           |
| 358 |                           |
| 359 |                           |
| 360 |                           |
| 361 |                           |
| 362 |                           |
| 363 |                           |
| 364 |                           |
| 365 |                           |
| 366 |                           |
| 367 |                           |
| 368 |                           |
| 369 |                           |
| 370 |                           |

RCC for Publication.sav

|     | Diagnosedatum_<br>Primär | Met_EarliestDatum | Last_contact_<br>Datum | AgeAtDiagnosis | Diagnosis_to<br>_lastcontact |
|-----|--------------------------|-------------------|------------------------|----------------|------------------------------|
| 371 |                          |                   |                        |                |                              |
| 372 |                          |                   |                        |                |                              |
| 373 |                          |                   |                        |                |                              |
| 374 |                          |                   |                        |                |                              |
| 375 |                          |                   |                        |                |                              |
| 376 |                          |                   |                        |                |                              |
| 377 |                          |                   |                        |                |                              |
| 378 |                          |                   |                        |                |                              |
| 379 |                          |                   |                        |                |                              |
| 380 |                          |                   |                        |                |                              |
| 381 |                          |                   |                        |                |                              |
| 382 |                          |                   |                        |                |                              |

RCC for Publication.sav

|     | Survival_OS | Survival_DSS | Geschlecht | pT_grouped |
|-----|-------------|--------------|------------|------------|
| 371 |             |              |            |            |
| 372 |             |              |            |            |
| 373 |             |              |            |            |
| 374 |             |              |            |            |
| 375 |             |              |            |            |
| 376 |             |              |            |            |
| 377 |             |              |            |            |
| 378 |             |              |            |            |
| 379 |             |              |            |            |
| 380 |             |              |            |            |
| 381 |             |              |            |            |
| 382 |             |              |            |            |

RCC for Publication.sav

|     | Morphology_coded | Grading_Paktuell<br>April2013 | ECOG | Prop_PD1 |
|-----|------------------|-------------------------------|------|----------|
| 371 |                  |                               |      |          |
| 372 |                  |                               |      |          |
| 373 |                  |                               |      |          |
| 374 |                  |                               |      |          |
| 375 |                  |                               |      |          |
| 376 |                  |                               |      |          |
| 377 |                  |                               |      |          |
| 378 |                  |                               |      |          |
| 379 |                  |                               |      |          |
| 380 |                  |                               |      |          |
| 381 |                  |                               |      |          |
| 382 |                  |                               |      |          |

RCC for Publication.sav

|     | Intens_PD1 | PD1IRS | Prop_PDL1_TU | Intens_PDL1_TU | PDL1_TU_IRS |
|-----|------------|--------|--------------|----------------|-------------|
| 371 |            |        |              |                |             |
| 372 |            |        |              |                |             |
| 373 |            |        |              |                |             |
| 374 |            |        |              |                |             |
| 375 |            |        |              |                |             |
| 376 |            |        |              |                |             |
| 377 |            |        |              |                |             |
| 378 |            |        |              |                |             |
| 379 |            |        |              |                |             |
| 380 |            |        |              |                |             |
| 381 |            |        |              |                |             |
| 382 |            |        |              |                |             |



RCC for Publication.sav

|     | Prop_PDL1_Lymph | Intens_PDL1_Lymph | PDL1_Lymph_IRS | andreasProp_Lymph_CTLA4_TU |
|-----|-----------------|-------------------|----------------|----------------------------|
| 371 |                 |                   |                |                            |
| 372 |                 |                   |                |                            |
| 373 |                 |                   |                |                            |
| 374 |                 |                   |                |                            |
| 375 |                 |                   |                |                            |
| 376 |                 |                   |                |                            |
| 377 |                 |                   |                |                            |
| 378 |                 |                   |                |                            |
| 379 |                 |                   |                |                            |
| 380 |                 |                   |                |                            |
| 381 |                 |                   |                |                            |
| 382 |                 |                   |                |                            |

RCC for Publication.sav

|     | CD3medianbis2k5unddarüber |
|-----|---------------------------|
| 371 |                           |
| 372 |                           |
| 373 |                           |
| 374 |                           |
| 375 |                           |
| 376 |                           |
| 377 |                           |
| 378 |                           |
| 379 |                           |
| 380 |                           |
| 381 |                           |
| 382 |                           |
