# Supplementary material for: Expression of PD-1 and CTLA-4 Are Negative Prognostic Markers in Renal Cell Carcinoma
Source: MDPI journal article supplement (doi:10.3390/jcm8050743), 2019-05-24
Supplement: s1 [file s1]

# Supplementary Tables.

**Table S1.** Univariate Cox regression analysis: Association of clinical parameters and immunological markers with OS or CSS in all RCC patients.

| All RCC       | OS           |       |        |          | CSS                      |       |        |          |
|---------------|--------------|-------|--------|----------|--------------------------|-------|--------|----------|
|               | Hazard Ratio | Range |        | p-value  | Hazard Ratio             | Range |        | p-value  |
| PD-1 TIMC     | 2.466        | 1.362 | 4.465  | 0.003*   | 2.344                    | 0.901 | 6.101  | 0.081    |
| PD-L1 TU      | 1.130        | 0.614 | 2078   | 0.695    | 0.977                    | 0.344 | 2.775  | 0.964    |
| PD-L1 TIMC    | 0.793        | 0.290 | 2.165  | 0.650    | No cancer specific death |       |        |          |
| CTLA-4        | 2.442        | 1.176 | 5.067  | 0.017*   | 3.271                    | 1.146 | 9.337  | 0.027*   |
| PD-1 + CTLA-4 | 4.284        | 1.718 | 10.680 | 0.002**  | 6.317                    | 1.898 | 21.026 | 0.003**  |
| CD3           | 0.903        | 0.595 | 1.369  | 0.630    | 1.344                    | 0.683 | 2.644  | 0.393    |
| Age >65years  | 2.696        | 1.733 | 4.194  | <0.001** | 2.255                    | 1.120 | 4.537  | 0.023*   |
| Gender male   | 1.802        | 1.115 | 2.911  | 0.016*   | 1.278                    | 0.626 | 2.610  | 0.646    |
| Stage >pT2    | 3.352        | 2.216 | 5.071  | <0.001** | 3.029                    | 1.544 | 5.943  | 0.001**  |
| Grade =G3     | 3.546        | 2.353 | 5.346  | <0.001** | 6.661                    | 3.354 | 13.231 | <0.001** |
| ECOG >0       | 2.338        | 1.485 | 3.682  | <0.001** | 1.947                    | 0.921 | 4.157  | 0.085    |

\*\* Correlation is significant at 0.01 level (2-tailed) \* Correlation is significant at 0.05 level (2-tailed).

**Table S2.** Univariate Cox regression analysis: Association of clinical parameters and immunological markers with OS or CSS in the no primary metastases subgroup.

| No primary metastases | OS           |       |        |          | CSS                      |       |        |          |
|-----------------------|--------------|-------|--------|----------|--------------------------|-------|--------|----------|
|                       | Hazard Ratio | Range |        | p-value  | Hazard Ratio             | Range |        | p-value  |
| PD-1 TIMC             | 2.108        | 0.956 | 4.647  | 0.065    | 2.053                    | 0.469 | 8.980  | 0.339    |
| PD-L1 TU              | 1.128        | 5.557 | 2.284  | 0.738    | 0.780                    | 0.181 | 3.366  | 0.739    |
| PD-L1 TIMC            | 1.000        | 0.363 | 2.758  | 1.000    | No cancer specific death |       |        |          |
| CTLA-4                | 2.516        | 1.004 | 6.300  | 0.049*   | 5.903                    | 1.711 | 20.369 | 0.005**  |
| PD-1 + CTLA-4         | 6.420        | 1.972 | 20.904 | 0.002**  | 16.349                   | 3.526 | 75.818 | <0.001** |
| CD3                   | 0.702        | 0.425 | 1.160  | 0.168    | 0.988                    | 0.401 | 2.431  | 0.979    |
| Age >65years          | 2.374        | 1.438 | 3.919  | 0.001**  | 1.919                    | 0.783 | 4.701  | 0.154    |
| Gender male           | 1.824        | 1.039 | 3.203  | 0.036*   | 1.394                    | 0.535 | 3.629  | 0.496    |
| Stage >pT2            | 3.285        | 2.013 | 5.360  | <0.001** | 2.500                    | 0.984 | 6.352  | 0.054    |
| Grade =G3             | 2.514        | 1.524 | 4.145  | <0.001** | 4.417                    | 1.838 | 10.615 | 0.001**  |
| ECOG >0               | 2.187        | 1.256 | 3.807  | 0.006**  | 1.445                    | 0.445 | 4.693  | 0.540    |

\*\* Correlation is significant at 0.01 level (2-tailed) \* Correlation is significant at 0.05 level (2-tailed).
